# Supplementary material for: Atmospheric chemistry of oxazole: the mechanism and kinetic studies of the oxidation reaction initiated by OH radicals
Source: Royal Society of Chemistry journal article supplement (doi:10.1039/d0nj05797e), 2021-01-01
Supplement: d0nj05797e1.pdf [file d0nj05797e1.pdf]

# Atmospheric chemistry of oxazole: The mechanism and kinetic studies on oxidation reaction initiated by OH radicals

Abolfazl Shiroudi<sup>a,\*</sup>, Mohamed A. Abdel-Rahman<sup>b</sup>,  
Ahmed M. El-Nahas<sup>b</sup> and Mohammednoor Altarawneh<sup>c,d</sup>

<sup>a</sup> Young Researchers and Elite Club, East Tehran Branch, Islamic Azad University, Tehran, Iran

<sup>b</sup> Chemistry Department, Faculty of Science, Menoufia University, Shebin El-Kom 32512, Egypt

<sup>c</sup> Discipline of Chemistry and Physics, College of Science, Health, Engineering and Education, Murdoch University, Murdoch, WA 6150, Australia

<sup>d</sup> Chemical Engineering Department, UAE University, Al-Ain 15551, United Arab Emirates

## Electronic Supplementary Information

---

\* Corresponding author: E-mail: [abolfazl.shiroudi@iauet.ac.ir](mailto:abolfazl.shiroudi@iauet.ac.ir) (A. Shiroudi)

**Table S1:** Optimize structures of reactants, Pre-reactive complexes, products, and transitions states at M06-2x/aug-cc-pVTZ and  $\omega$ B97XD/aug-cc-pVTZ levels.

|                                                                                   |              |              |             |                                                                                     |              |              |             |
|-----------------------------------------------------------------------------------|--------------|--------------|-------------|-------------------------------------------------------------------------------------|--------------|--------------|-------------|
| 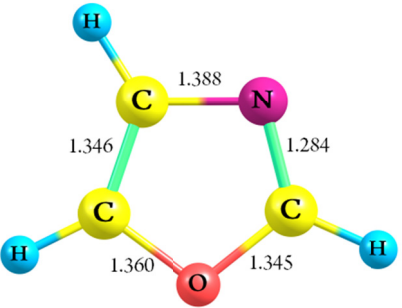 |              |              |             |  |              |              |             |
| <b>Oxazole [M06-2x]</b>                                                           |              |              |             | <b>Oxazole [<math>\omega</math>B97XD]</b>                                           |              |              |             |
| 6                                                                                 | -0.596128000 | -0.958006000 | 0.000000000 | 6                                                                                   | -0.596049000 | -0.956351000 | 0.000000000 |
| 6                                                                                 | 0.747760000  | -0.876311000 | 0.000000000 | 6                                                                                   | 0.746766000  | -0.875546000 | 0.000000000 |
| 6                                                                                 | 0.000000000  | 1.095687000  | 0.000000000 | 6                                                                                   | 0.000000000  | 1.093744000  | 0.000000000 |
| 1                                                                                 | -1.308232000 | -1.761359000 | 0.000000000 | 1                                                                                   | -1.310086000 | -1.757977000 | 0.000000000 |
| 1                                                                                 | 1.474977000  | -1.668136000 | 0.000000000 | 1                                                                                   | 1.474018000  | -1.667682000 | 0.000000000 |
| 1                                                                                 | -0.165749000 | 2.159282000  | 0.000000000 | 1                                                                                   | -0.162840000 | 2.157816000  | 0.000000000 |
| 7                                                                                 | 1.116500000  | 0.461873000  | 0.000000000 | 7                                                                                   | 1.117214000  | 0.460010000  | 0.000000000 |
| 8                                                                                 | -1.090786000 | 0.308611000  | 0.000000000 | 8                                                                                   | -1.090737000 | 0.309586000  | 0.000000000 |
| Zero-point correction= 0.059179 (Hartree/Particle)                                |              |              |             | Zero-point correction= 0.059429 (Hartree/Particle)                                  |              |              |             |
| Thermal correction to Energy= 0.062680                                            |              |              |             | Thermal correction to Energy= 0.062928                                              |              |              |             |
| Thermal correction to Enthalpy= 0.063624                                          |              |              |             | Thermal correction to Enthalpy= 0.063872                                            |              |              |             |
| Thermal correction to Gibbs Free Energy= 0.033044                                 |              |              |             | Thermal correction to Gibbs Free Energy= 0.033297                                   |              |              |             |
| Sum of electronic and zero-point Energies= -246.011529                            |              |              |             | Sum of electronic and zero-point Energies= -246.018359                              |              |              |             |
| Sum of electronic and thermal Energies= -246.008028                               |              |              |             | Sum of electronic and thermal Energies= -246.014860                                 |              |              |             |
| Sum of electronic and thermal Enthalpies= -246.007083                             |              |              |             | Sum of electronic and thermal Enthalpies= -246.013916                               |              |              |             |
| Sum of electronic and thermal Free Energies= -246.037663                          |              |              |             | Sum of electronic and thermal Free Energies= -246.044491                            |              |              |             |

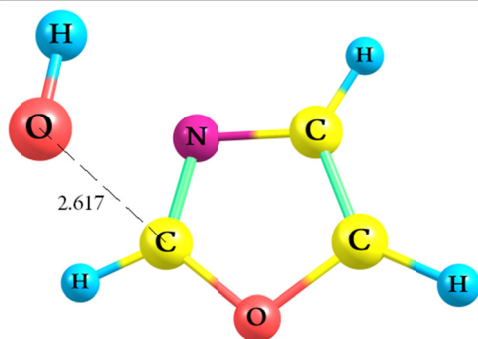

**IM1 [M06-2x]**

|   |              |              |              |
|---|--------------|--------------|--------------|
| 6 | -1.323826000 | -0.182142000 | -0.670959000 |
| 6 | -0.950557000 | 1.017070000  | -0.185514000 |
| 6 | 0.143602000  | -0.458995000 | 0.858061000  |
| 7 | 0.001608000  | 0.821365000  | 0.804851000  |
| 8 | -0.627732000 | -1.138044000 | -0.002658000 |
| 8 | 2.266250000  | -0.030935000 | -0.611510000 |
| 1 | -2.008624000 | -0.514974000 | -1.427790000 |
| 1 | -1.286981000 | 1.998276000  | -0.467333000 |
| 1 | 0.793152000  | -1.032643000 | 1.496598000  |
| 1 | 2.167730000  | 0.896024000  | -0.331620000 |

|                                              |                             |
|----------------------------------------------|-----------------------------|
| Zero-point correction=                       | 0.070166 (Hartree/Particle) |
| Thermal correction to Energy=                | 0.076644                    |
| Thermal correction to Enthalpy=              | 0.077588                    |
| Thermal correction to Gibbs Free Energy=     | 0.038482                    |
| Sum of electronic and zero-point Energies=   | -321.741970                 |
| Sum of electronic and thermal Energies=      | -321.735492                 |
| Sum of electronic and thermal Enthalpies=    | -321.734548                 |
| Sum of electronic and thermal Free Energies= | -321.773655                 |

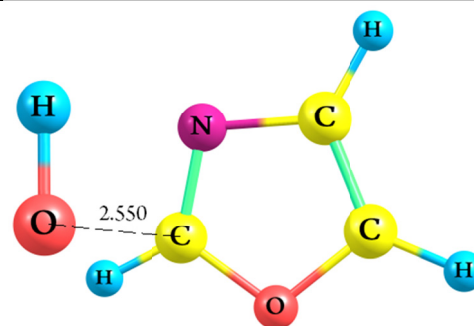

**IM1 [ $\omega$ B97XD]**

|   |              |              |              |
|---|--------------|--------------|--------------|
| 6 | -1.357658000 | -0.256124000 | -0.619097000 |
| 6 | -1.014473000 | 0.983125000  | -0.218753000 |
| 6 | 0.195587000  | -0.387127000 | 0.836906000  |
| 7 | -0.010748000 | 0.884644000  | 0.727106000  |
| 8 | -0.589179000 | -1.143759000 | 0.059696000  |
| 8 | 2.277406000  | -0.046020000 | -0.595635000 |
| 1 | -2.065729000 | -0.658666000 | -1.318396000 |
| 1 | -1.408669000 | 1.932149000  | -0.535029000 |
| 1 | 0.882695000  | -0.895803000 | 1.489447000  |
| 1 | 2.220392000  | 0.908795000  | -0.432596000 |

|                                              |                             |
|----------------------------------------------|-----------------------------|
| Zero-point correction=                       | 0.070062 (Hartree/Particle) |
| Thermal correction to Energy=                | 0.076585                    |
| Thermal correction to Enthalpy=              | 0.077529                    |
| Thermal correction to Gibbs Free Energy=     | 0.038363                    |
| Sum of electronic and zero-point Energies=   | -321.754459                 |
| Sum of electronic and thermal Energies=      | -321.747936                 |
| Sum of electronic and thermal Enthalpies=    | -321.746992                 |
| Sum of electronic and thermal Free Energies= | -321.786158                 |

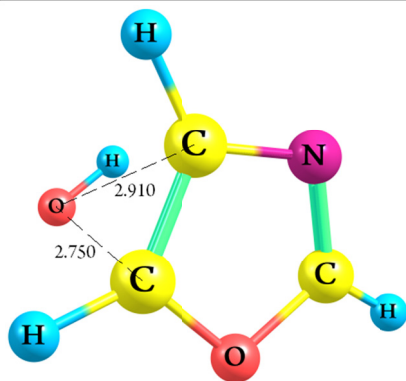

**IM<sub>x</sub> (x=2,3) [M06-2x]**

|   |              |              |              |
|---|--------------|--------------|--------------|
| 6 | -0.046239000 | -0.486922000 | 0.950119000  |
| 6 | 0.104235000  | 0.844065000  | 0.770500000  |
| 6 | 1.230504000  | -0.127550000 | -0.725968000 |
| 1 | -0.591253000 | -1.099420000 | 1.642882000  |
| 1 | -0.318795000 | 1.654027000  | 1.337239000  |
| 1 | 1.857214000  | -0.414544000 | -1.552888000 |
| 7 | 0.929253000  | 1.056435000  | -0.325258000 |
| 8 | 0.683530000  | -1.118885000 | -0.001640000 |
| 8 | -2.338019000 | -0.079013000 | -0.514071000 |
| 1 | -1.947027000 | 0.670519000  | -0.992637000 |

|                                              |                             |
|----------------------------------------------|-----------------------------|
| Zero-point correction=                       | 0.069738 (Hartree/Particle) |
| Thermal correction to Energy=                | 0.075561                    |
| Thermal correction to Enthalpy=              | 0.076505                    |
| Thermal correction to Gibbs Free Energy=     | 0.038801                    |
| Sum of electronic and zero-point Energies=   | -321.741909                 |
| Sum of electronic and thermal Energies=      | -321.736086                 |
| Sum of electronic and thermal Enthalpies=    | -321.735142                 |
| Sum of electronic and thermal Free Energies= | -321.772846                 |

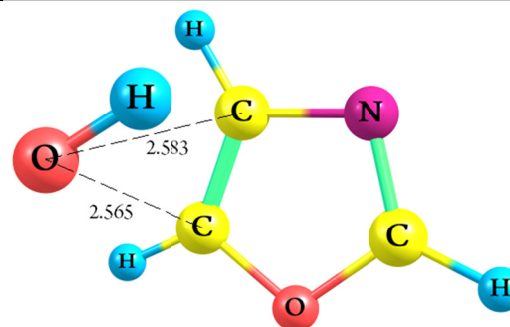

**IM<sub>x</sub> (x=2,3) [ωB97XD]**

|   |              |              |              |
|---|--------------|--------------|--------------|
| 6 | -0.099207000 | 0.744972000  | 0.732443000  |
| 6 | -0.137036000 | -0.602836000 | 0.862203000  |
| 6 | 1.309361000  | -0.145089000 | -0.599861000 |
| 7 | 0.778017000  | -1.159561000 | -0.015778000 |
| 8 | 0.837307000  | 1.047405000  | -0.195350000 |
| 8 | -2.186404000 | 0.032292000  | -0.576451000 |
| 1 | -0.620753000 | 1.561976000  | 1.192545000  |
| 1 | -0.745628000 | -1.200567000 | 1.515528000  |
| 1 | 2.071849000  | -0.136368000 | -1.359417000 |
| 1 | -1.797521000 | -0.727963000 | -1.032502000 |

|                                              |                             |
|----------------------------------------------|-----------------------------|
| Zero-point correction=                       | 0.070513 (Hartree/Particle) |
| Thermal correction to Energy=                | 0.077020                    |
| Thermal correction to Enthalpy=              | 0.077965                    |
| Thermal correction to Gibbs Free Energy=     | 0.038691                    |
| Sum of electronic and zero-point Energies=   | -321.755047                 |
| Sum of electronic and thermal Energies=      | -321.748540                 |
| Sum of electronic and thermal Enthalpies=    | -321.747596                 |
| Sum of electronic and thermal Free Energies= | -321.786869                 |

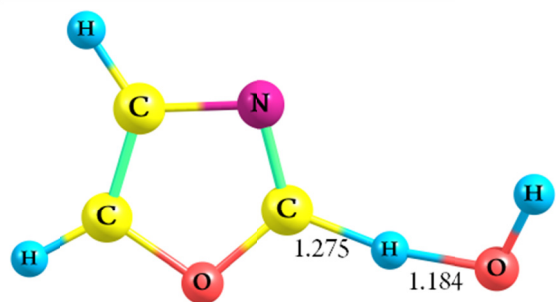

TS1 [M06-2x]

|   |              |              |              |
|---|--------------|--------------|--------------|
| 6 | 0.371065000  | -0.012262000 | -0.065975000 |
| 6 | -1.672584000 | -0.584800000 | 0.039120000  |
| 6 | -1.575445000 | 0.757016000  | 0.022464000  |
| 1 | -2.354781000 | 1.496829000  | 0.051937000  |
| 1 | -2.480263000 | -1.290881000 | 0.081116000  |
| 8 | 2.802284000  | -0.097946000 | 0.014972000  |
| 8 | -0.403602000 | -1.098243000 | -0.013861000 |
| 7 | -0.225437000 | 1.110975000  | -0.040767000 |
| 1 | 1.630204000  | -0.204082000 | -0.119046000 |
| 1 | 2.855226000  | 0.831100000  | 0.288819000  |

Zero-point correction= 0.063807 (Hartree/Particle)  
 Thermal correction to Energy= 0.069942  
 Thermal correction to Enthalpy= 0.070886  
 Thermal correction to Gibbs Free Energy= 0.032403  
 Sum of electronic and zero-point Energies= -321.723173  
 Sum of electronic and thermal Energies= -321.717038  
 Sum of electronic and thermal Enthalpies= -321.716094  
 Sum of electronic and thermal Free Energies= -321.754577

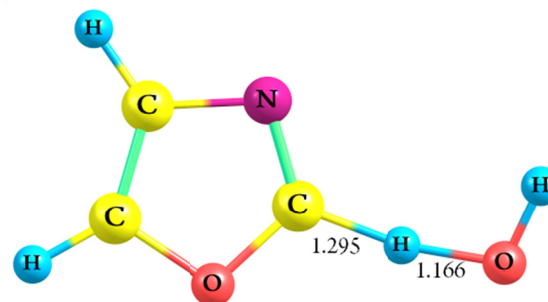

TS1 [ $\omega$ B97XD]

|   |              |              |              |
|---|--------------|--------------|--------------|
| 6 | 0.365827000  | 0.008588000  | -0.051436000 |
| 6 | -1.663234000 | -0.601713000 | 0.030948000  |
| 6 | -1.591174000 | 0.740892000  | 0.017517000  |
| 1 | -2.384361000 | 1.466370000  | 0.038647000  |
| 1 | -2.456918000 | -1.323938000 | 0.061720000  |
| 8 | 2.805785000  | -0.099529000 | 0.007058000  |
| 8 | -0.384658000 | -1.091660000 | -0.009558000 |
| 7 | -0.250110000 | 1.120221000  | -0.031230000 |
| 1 | 1.647115000  | -0.169406000 | -0.101076000 |
| 1 | 2.907399000  | 0.828338000  | 0.257145000  |

Zero-point correction= 0.063880 (Hartree/Particle)  
 Thermal correction to Energy= 0.070114  
 Thermal correction to Enthalpy= 0.071059  
 Thermal correction to Gibbs Free Energy= 0.031718  
 Sum of electronic and zero-point Energies= -321.739428  
 Sum of electronic and thermal Energies= -321.733194  
 Sum of electronic and thermal Enthalpies= -321.732250  
 Sum of electronic and thermal Free Energies= -321.771590

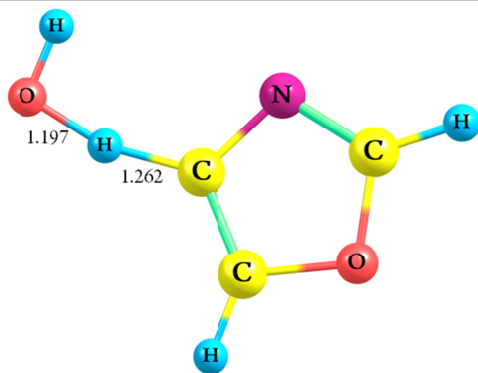

TS2 [M06-2x]

|   |              |              |              |
|---|--------------|--------------|--------------|
| 6 | -0.523930000 | 1.129428000  | 0.000006000  |
| 6 | -1.439549000 | -0.810514000 | 0.000020000  |
| 6 | 0.410142000  | 0.161325000  | -0.000122000 |
| 1 | -2.265543000 | -1.500507000 | 0.000061000  |
| 1 | -0.518886000 | 2.201770000  | 0.000041000  |
| 8 | 2.842462000  | 0.067917000  | -0.000009000 |
| 7 | -0.178156000 | -1.072634000 | -0.000088000 |
| 8 | -1.734134000 | 0.499319000  | 0.000078000  |
| 1 | 1.665855000  | 0.289198000  | -0.000249000 |
| 1 | 2.819067000  | -0.901349000 | 0.000794000  |

Zero-point correction= 0.064390 (Hartree/Particle)  
 Thermal correction to Energy= 0.070340  
 Thermal correction to Enthalpy= 0.071284  
 Thermal correction to Gibbs Free Energy= 0.033625  
 Sum of electronic and zero-point Energies= -321.724662  
 Sum of electronic and thermal Energies= -321.718712  
 Sum of electronic and thermal Enthalpies= -321.717768  
 Sum of electronic and thermal Free Energies= -321.755426

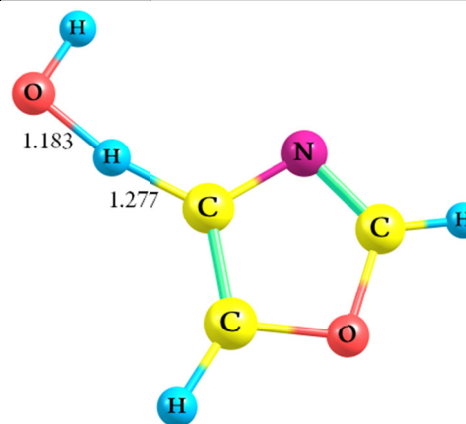

TS2 [ $\omega$ B97XD]

|   |              |              |              |
|---|--------------|--------------|--------------|
| 6 | 0.493547000  | 1.120068000  | 0.000106000  |
| 6 | 1.468978000  | -0.786337000 | 0.000033000  |
| 6 | -0.407401000 | 0.123092000  | -0.000051000 |
| 1 | 2.314132000  | -1.452684000 | 0.000049000  |
| 1 | 0.451133000  | 2.191740000  | 0.000191000  |
| 8 | -2.852739000 | 0.069540000  | -0.000142000 |
| 7 | 0.215778000  | -1.088066000 | -0.000092000 |
| 8 | 1.723436000  | 0.530629000  | 0.000156000  |
| 1 | -1.680348000 | 0.230726000  | -0.000155000 |
| 1 | -2.891684000 | -0.895610000 | -0.000075000 |

Zero-point correction= 0.064191 (Hartree/Particle)  
 Thermal correction to Energy= 0.070256  
 Thermal correction to Enthalpy= 0.071200  
 Thermal correction to Gibbs Free Energy= 0.033183  
 Sum of electronic and zero-point Energies= -321.741386  
 Sum of electronic and thermal Energies= -321.735321  
 Sum of electronic and thermal Enthalpies= -321.734377  
 Sum of electronic and thermal Free Energies= -321.772394

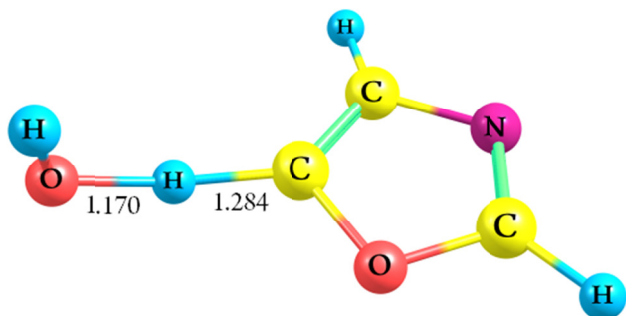

TS3 [M06-2x]

|   |              |              |              |
|---|--------------|--------------|--------------|
| 6 | -0.390853000 | 0.150560000  | -0.107835000 |
| 6 | 1.553906000  | -0.686289000 | 0.041138000  |
| 6 | 0.502695000  | 1.154213000  | -0.016607000 |
| 1 | 0.343133000  | 2.216146000  | -0.019285000 |
| 1 | 2.271440000  | -1.487428000 | 0.084318000  |
| 8 | 0.253529000  | -1.033323000 | -0.058470000 |
| 7 | 1.765541000  | 0.580845000  | 0.067639000  |
| 8 | -2.812756000 | -0.018864000 | -0.031765000 |
| 1 | -1.668394000 | 0.114539000  | -0.235823000 |
| 1 | -2.825641000 | -0.202578000 | 0.919021000  |

|                                              |                             |
|----------------------------------------------|-----------------------------|
| Zero-point correction=                       | 0.064307 (Hartree/Particle) |
| Thermal correction to Energy=                | 0.070242                    |
| Thermal correction to Enthalpy=              | 0.071186                    |
| Thermal correction to Gibbs Free Energy=     | 0.033593                    |
| Sum of electronic and zero-point Energies=   | -321.721477                 |
| Sum of electronic and thermal Energies=      | -321.715542                 |
| Sum of electronic and thermal Enthalpies=    | -321.714598                 |
| Sum of electronic and thermal Free Energies= | -321.752191                 |

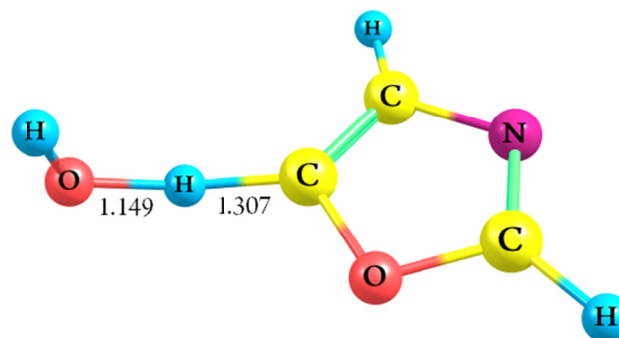

TS3 [ $\omega$ B97XD]

|   |              |              |              |
|---|--------------|--------------|--------------|
| 6 | -0.388064000 | 0.128871000  | -0.097902000 |
| 6 | 1.567318000  | -0.670659000 | 0.039203000  |
| 6 | 0.485642000  | 1.149304000  | -0.016394000 |
| 1 | 0.305600000  | 2.208203000  | -0.022103000 |
| 1 | 2.301817000  | -1.456314000 | 0.076179000  |
| 8 | 0.274717000  | -1.042527000 | -0.047352000 |
| 7 | 1.757373000  | 0.600886000  | 0.058393000  |
| 8 | -2.817801000 | -0.025455000 | -0.040554000 |
| 1 | -1.688203000 | 0.077136000  | -0.225855000 |
| 1 | -2.865529000 | -0.136470000 | 0.916822000  |

|                                              |                             |
|----------------------------------------------|-----------------------------|
| Zero-point correction=                       | 0.064239 (Hartree/Particle) |
| Thermal correction to Energy=                | 0.070300                    |
| Thermal correction to Enthalpy=              | 0.071244                    |
| Thermal correction to Gibbs Free Energy=     | 0.033284                    |
| Sum of electronic and zero-point Energies=   | -321.737826                 |
| Sum of electronic and thermal Energies=      | -321.731764                 |
| Sum of electronic and thermal Enthalpies=    | -321.730820                 |
| Sum of electronic and thermal Free Energies= | -321.768780                 |

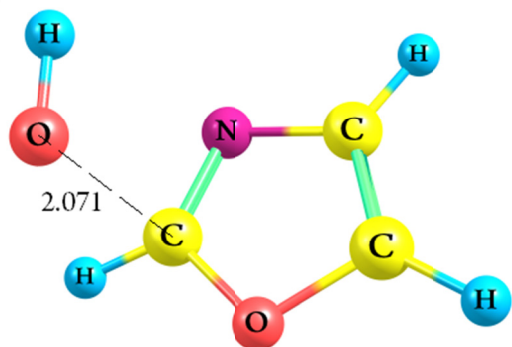

### TS4 [M06-2x]

|   |              |              |              |
|---|--------------|--------------|--------------|
| 6 | -1.290904000 | -0.495083000 | -0.449492000 |
| 6 | -1.127628000 | 0.840630000  | -0.275846000 |
| 6 | 0.424971000  | -0.145700000 | 0.775276000  |
| 7 | -0.046400000 | 1.054352000  | 0.537019000  |
| 8 | -0.328037000 | -1.131222000 | 0.247976000  |
| 8 | 1.934169000  | -0.067684000 | -0.640916000 |
| 1 | -1.986957000 | -1.103868000 | -0.996087000 |
| 1 | -1.712479000 | 1.647511000  | -0.679949000 |
| 1 | 1.160383000  | -0.427210000 | 1.506988000  |
| 1 | 1.976164000  | 0.895263000  | -0.746192000 |

|                                              |                             |
|----------------------------------------------|-----------------------------|
| Zero-point correction=                       | 0.070312 (Hartree/Particle) |
| Thermal correction to Energy=                | 0.075635                    |
| Thermal correction to Enthalpy=              | 0.076579                    |
| Thermal correction to Gibbs Free Energy=     | 0.040837                    |
| Sum of electronic and zero-point Energies=   | -321.736867                 |
| Sum of electronic and thermal Energies=      | -321.731544                 |
| Sum of electronic and thermal Enthalpies=    | -321.730600                 |
| Sum of electronic and thermal Free Energies= | -321.766342                 |

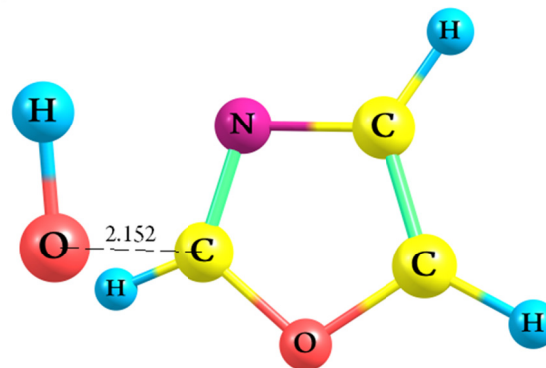

### TS4 [ $\omega$ B97XD]

|   |              |              |              |
|---|--------------|--------------|--------------|
| 6 | -1.310236000 | -0.469574000 | -0.471247000 |
| 6 | -1.124289000 | 0.857164000  | -0.276449000 |
| 6 | 0.388419000  | -0.172643000 | 0.784558000  |
| 7 | -0.048577000 | 1.038416000  | 0.552663000  |
| 8 | -0.365860000 | -1.134958000 | 0.226028000  |
| 8 | 2.010584000  | -0.065499000 | -0.624900000 |
| 1 | -2.009365000 | -1.057948000 | -1.035579000 |
| 1 | -1.686650000 | 1.682320000  | -0.675922000 |
| 1 | 1.123004000  | -0.478200000 | 1.506541000  |
| 1 | 2.031902000  | 0.898896000  | -0.693881000 |

|                                              |                             |
|----------------------------------------------|-----------------------------|
| Zero-point correction=                       | 0.070519 (Hartree/Particle) |
| Thermal correction to Energy=                | 0.075914                    |
| Thermal correction to Enthalpy=              | 0.076858                    |
| Thermal correction to Gibbs Free Energy=     | 0.040864                    |
| Sum of electronic and zero-point Energies=   | -321.753036                 |
| Sum of electronic and thermal Energies=      | -321.747641                 |
| Sum of electronic and thermal Enthalpies=    | -321.746697                 |
| Sum of electronic and thermal Free Energies= | -321.782691                 |



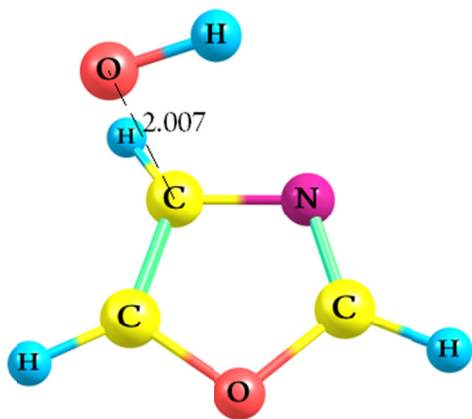

TS5 [M06-2x]

|   |              |              |              |
|---|--------------|--------------|--------------|
| 6 | 0.114307000  | 1.080330000  | 0.342159000  |
| 6 | -0.499179000 | -0.067174000 | 0.792962000  |
| 6 | 1.226638000  | -0.627715000 | -0.305094000 |
| 7 | 0.291899000  | -1.151785000 | 0.391374000  |
| 8 | 1.188941000  | 0.724501000  | -0.387605000 |
| 8 | -1.948547000 | -0.005155000 | -0.594178000 |
| 1 | -0.133911000 | 2.123617000  | 0.391336000  |
| 1 | -1.239526000 | -0.167356000 | 1.563568000  |
| 1 | 2.033157000  | -1.119103000 | -0.822503000 |
| 1 | -1.676760000 | -0.842075000 | -0.997916000 |

|                                              |                             |
|----------------------------------------------|-----------------------------|
| Zero-point correction=                       | 0.070720 (Hartree/Particle) |
| Thermal correction to Energy=                | 0.076171                    |
| Thermal correction to Enthalpy=              | 0.077115                    |
| Thermal correction to Gibbs Free Energy=     | 0.040977                    |
| Sum of electronic and zero-point Energies=   | -321.733282                 |
| Sum of electronic and thermal Energies=      | -321.727831                 |
| Sum of electronic and thermal Enthalpies=    | -321.726887                 |
| Sum of electronic and thermal Free Energies= | -321.763025                 |

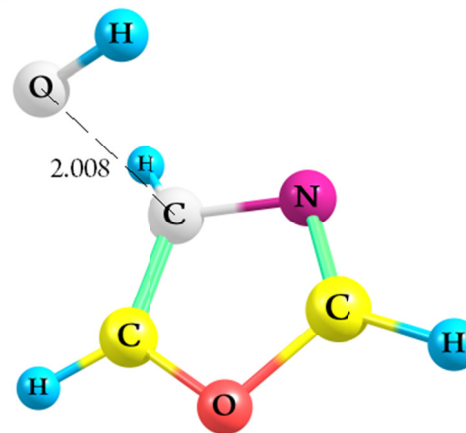

TS5 [ $\omega$ B97XD]

|   |              |              |              |
|---|--------------|--------------|--------------|
| 6 | 0.121061000  | 1.077273000  | 0.337965000  |
| 6 | -0.499425000 | -0.072554000 | 0.777260000  |
| 6 | 1.237931000  | -0.625717000 | -0.302726000 |
| 7 | 0.295817000  | -1.154568000 | 0.380729000  |
| 8 | 1.203918000  | 0.724455000  | -0.382662000 |
| 8 | -1.982147000 | -0.001512000 | -0.574550000 |
| 1 | -0.122198000 | 2.120913000  | 0.396453000  |
| 1 | -1.229475000 | -0.172644000 | 1.557519000  |
| 1 | 2.050659000  | -1.116513000 | -0.810844000 |
| 1 | -1.701276000 | -0.807333000 | -1.025530000 |

|                                              |                             |
|----------------------------------------------|-----------------------------|
| Zero-point correction=                       | 0.070495 (Hartree/Particle) |
| Thermal correction to Energy=                | 0.075980                    |
| Thermal correction to Enthalpy=              | 0.076924                    |
| Thermal correction to Gibbs Free Energy=     | 0.040697                    |
| Sum of electronic and zero-point Energies=   | -321.750429                 |
| Sum of electronic and thermal Energies=      | -321.744944                 |
| Sum of electronic and thermal Enthalpies=    | -321.744000                 |
| Sum of electronic and thermal Free Energies= | -321.780227                 |

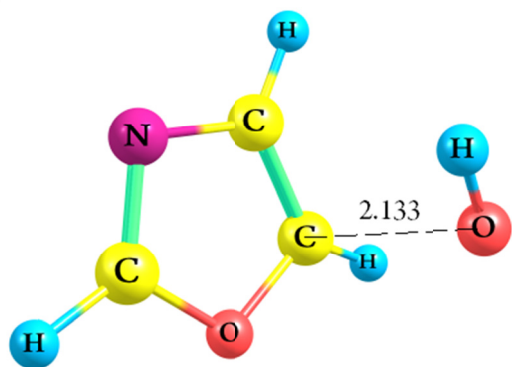

TS6 [M06-2x]

|   |              |              |              |
|---|--------------|--------------|--------------|
| 6 | -0.406737000 | -0.204550000 | 0.817096000  |
| 6 | 0.073657000  | 1.033409000  | 0.480563000  |
| 6 | 1.301744000  | -0.398447000 | -0.454102000 |
| 1 | -1.130647000 | -0.558336000 | 1.524812000  |
| 1 | -0.307034000 | 1.997966000  | 0.765630000  |
| 1 | 2.039867000  | -0.943469000 | -1.017154000 |
| 7 | 1.153210000  | 0.878553000  | -0.360599000 |
| 8 | 0.417198000  | -1.120347000 | 0.254532000  |
| 8 | -2.013031000 | -0.107917000 | -0.583341000 |
| 1 | -1.719977000 | 0.597612000  | -1.179964000 |

|                                              |                             |
|----------------------------------------------|-----------------------------|
| Zero-point correction=                       | 0.070463 (Hartree/Particle) |
| Thermal correction to Energy=                | 0.075935                    |
| Thermal correction to Enthalpy=              | 0.076879                    |
| Thermal correction to Gibbs Free Energy=     | 0.040626                    |
| Sum of electronic and zero-point Energies=   | -321.739076                 |
| Sum of electronic and thermal Energies=      | -321.733605                 |
| Sum of electronic and thermal Enthalpies=    | -321.732661                 |
| Sum of electronic and thermal Free Energies= | -321.768914                 |

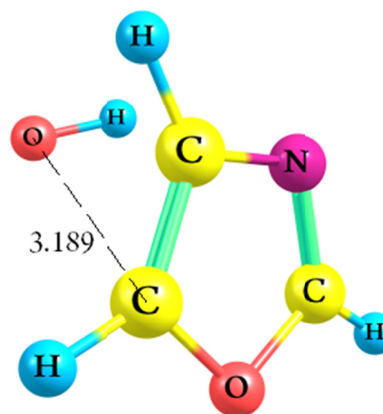

TS6 [ $\omega$ B97XD]

|   |              |              |              |
|---|--------------|--------------|--------------|
| 6 | -0.545050000 | 1.146516000  | 0.059331000  |
| 6 | 0.119714000  | 0.402011000  | 0.963746000  |
| 6 | -0.977304000 | -0.918671000 | -0.263007000 |
| 1 | -0.617614000 | 2.197045000  | -0.148811000 |
| 1 | 0.780295000  | 0.719628000  | 1.749936000  |
| 1 | -1.443015000 | -1.752523000 | -0.759333000 |
| 7 | -0.170809000 | -0.937170000 | 0.738056000  |
| 8 | -1.258249000 | 0.306775000  | -0.731782000 |
| 8 | 2.366572000  | 0.001257000  | -0.560118000 |
| 1 | 2.025257000  | -0.847349000 | -0.233409000 |

|                                              |                             |
|----------------------------------------------|-----------------------------|
| Zero-point correction=                       | 0.070170 (Hartree/Particle) |
| Thermal correction to Energy=                | 0.075825                    |
| Thermal correction to Enthalpy=              | 0.076769                    |
| Thermal correction to Gibbs Free Energy=     | 0.039664                    |
| Sum of electronic and zero-point Energies=   | -321.754198                 |
| Sum of electronic and thermal Energies=      | -321.748542                 |
| Sum of electronic and thermal Enthalpies=    | -321.747598                 |
| Sum of electronic and thermal Free Energies= | -321.784703                 |

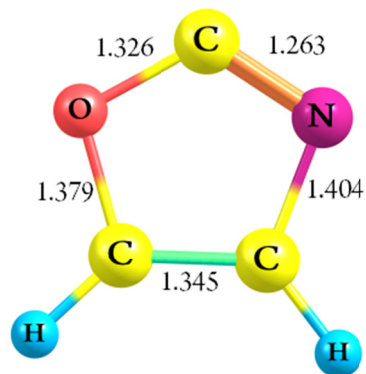

**P1 [M06-2x]**

|   |              |              |             |
|---|--------------|--------------|-------------|
| 6 | 0.000000000  | 1.082626000  | 0.000000000 |
| 6 | 1.069781000  | 0.268192000  | 0.000000000 |
| 6 | -0.627053000 | -0.938171000 | 0.000000000 |
| 7 | 0.629320000  | -1.065168000 | 0.000000000 |
| 8 | -1.127972000 | 0.289779000  | 0.000000000 |
| 1 | -0.153417000 | 2.144980000  | 0.000000000 |
| 1 | 2.115589000  | 0.517073000  | 0.000000000 |

Zero-point correction= 0.046440 (Hartree/Particle)  
 Thermal correction to Energy= 0.049913  
 Thermal correction to Enthalpy= 0.050857  
 Thermal correction to Gibbs Free Energy= 0.019742  
 Sum of electronic and zero-point Energies= -245.327971  
 Sum of electronic and thermal Energies= -245.324498  
 Sum of electronic and thermal Enthalpies= -245.323554  
 Sum of electronic and thermal Free Energies= -245.354669

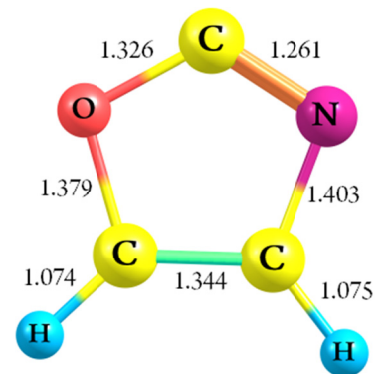

**P1 [ $\omega$ B97XD]**

|   |              |              |             |
|---|--------------|--------------|-------------|
| 6 | 0.000000000  | 1.081160000  | 0.000000000 |
| 6 | 1.070038000  | 0.267744000  | 0.000000000 |
| 6 | -0.625021000 | -0.936708000 | 0.000000000 |
| 7 | 0.629093000  | -1.063942000 | 0.000000000 |
| 8 | -1.129605000 | 0.289339000  | 0.000000000 |
| 1 | -0.153182000 | 2.143738000  | 0.000000000 |
| 1 | 2.116264000  | 0.515965000  | 0.000000000 |

Zero-point correction= 0.046142 (Hartree/Particle)  
 Thermal correction to Energy= 0.049657  
 Thermal correction to Enthalpy= 0.050601  
 Thermal correction to Gibbs Free Energy= 0.019429  
 Sum of electronic and zero-point Energies= -245.329437  
 Sum of electronic and thermal Energies= -245.325922  
 Sum of electronic and thermal Enthalpies= -245.324977  
 Sum of electronic and thermal Free Energies= -245.356149

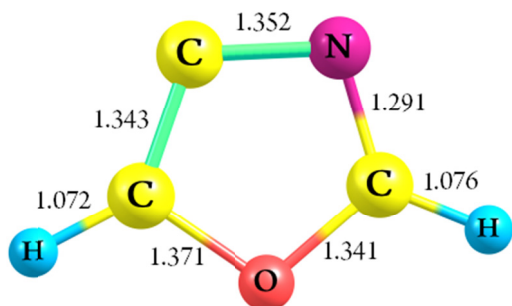

**P2 [M06-2x]**

|   |              |              |             |
|---|--------------|--------------|-------------|
| 6 | -0.513477000 | -1.039598000 | 0.000000000 |
| 6 | 0.817270000  | -0.862062000 | 0.000000000 |
| 6 | 0.000000000  | 1.046167000  | 0.000000000 |
| 1 | -0.201368000 | 2.103548000  | 0.000000000 |
| 7 | 1.145136000  | 0.449190000  | 0.000000000 |
| 8 | -1.056321000 | 0.219805000  | 0.000000000 |
| 1 | -1.186773000 | -1.873356000 | 0.000000000 |

Zero-point correction= 0.046773 (Hartree/Particle)  
 Thermal correction to Energy= 0.050216  
 Thermal correction to Enthalpy= 0.051161  
 Thermal correction to Gibbs Free Energy= 0.020100  
 Sum of electronic and zero-point Energies= -245.328187  
 Sum of electronic and thermal Energies= -245.324744  
 Sum of electronic and thermal Enthalpies= -245.323799  
 Sum of electronic and thermal Free Energies= -245.354860

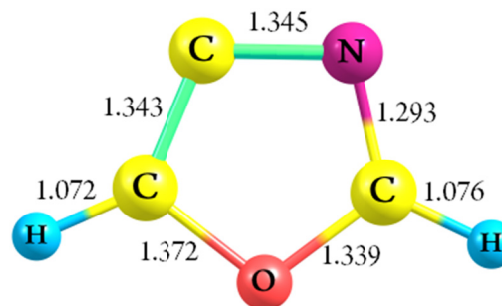

**P2 [ $\omega$ B97XD]**

|   |              |              |             |
|---|--------------|--------------|-------------|
| 6 | -0.513353000 | -1.038697000 | 0.000000000 |
| 6 | 0.817234000  | -0.859480000 | 0.000000000 |
| 6 | 0.000000000  | 1.044719000  | 0.000000000 |
| 1 | -0.197379000 | 2.102804000  | 0.000000000 |
| 7 | 1.145151000  | 0.445134000  | 0.000000000 |
| 8 | -1.056704000 | 0.221655000  | 0.000000000 |
| 1 | -1.188337000 | -1.871225000 | 0.000000000 |

Zero-point correction= 0.046549 (Hartree/Particle)  
 Thermal correction to Energy= 0.050020  
 Thermal correction to Enthalpy= 0.050965  
 Thermal correction to Gibbs Free Energy= 0.019869  
 Sum of electronic and zero-point Energies= -245.330085  
 Sum of electronic and thermal Energies= -245.326613  
 Sum of electronic and thermal Enthalpies= -245.325669  
 Sum of electronic and thermal Free Energies= -245.356765

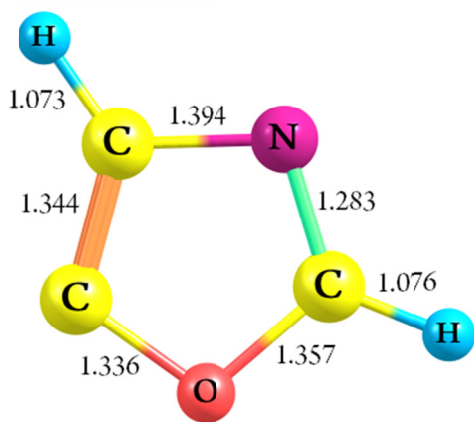

**P3 [M06-2x]**

|   |              |              |             |
|---|--------------|--------------|-------------|
| 6 | -0.658904000 | -0.957869000 | 0.000000000 |
| 6 | 0.685023000  | -0.966107000 | 0.000000000 |
| 6 | 0.000000000  | 1.048719000  | 0.000000000 |
| 1 | 1.374715000  | -1.787871000 | 0.000000000 |
| 1 | -0.129154000 | 2.116885000  | 0.000000000 |
| 7 | 1.088244000  | 0.368548000  | 0.000000000 |
| 8 | -1.127498000 | 0.292836000  | 0.000000000 |

Zero-point correction= 0.046521 (Hartree/Particle)  
 Thermal correction to Energy= 0.049977  
 Thermal correction to Enthalpy= 0.050921  
 Thermal correction to Gibbs Free Energy= 0.019832  
 Sum of electronic and zero-point Energies= -245.324367  
 Sum of electronic and thermal Energies= -245.320911  
 Sum of electronic and thermal Enthalpies= -245.319967  
 Sum of electronic and thermal Free Energies= -245.351056

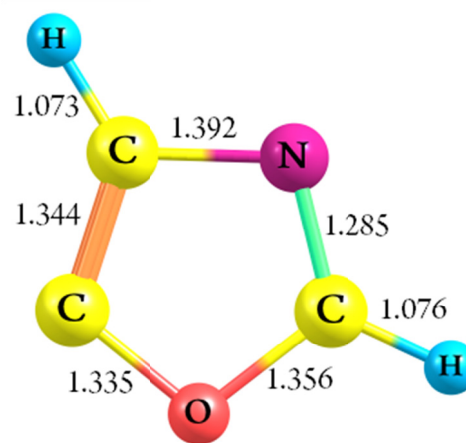

**P3 [ $\omega$ B97XD]**

|   |              |              |             |
|---|--------------|--------------|-------------|
| 6 | -0.658761000 | -0.953338000 | 0.000000000 |
| 6 | 0.685577000  | -0.968000000 | 0.000000000 |
| 6 | 0.000000000  | 1.046894000  | 0.000000000 |
| 1 | 1.374431000  | -1.790673000 | 0.000000000 |
| 1 | -0.124167000 | 2.115696000  | 0.000000000 |
| 7 | 1.088436000  | 0.364453000  | 0.000000000 |
| 8 | -1.128776000 | 0.296309000  | 0.000000000 |

Zero-point correction= 0.046380 (Hartree/Particle)  
 Thermal correction to Energy= 0.049862  
 Thermal correction to Enthalpy= 0.050806  
 Thermal correction to Gibbs Free Energy= 0.019682  
 Sum of electronic and zero-point Energies= -245.325476  
 Sum of electronic and thermal Energies= -245.321994  
 Sum of electronic and thermal Enthalpies= -245.321050  
 Sum of electronic and thermal Free Energies= -245.352175

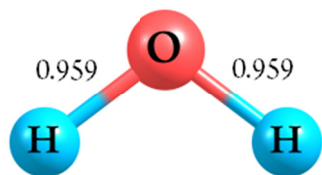

**H<sub>2</sub>O [M06-2x]**

|   |             |              |              |
|---|-------------|--------------|--------------|
| 8 | 0.000000000 | 0.000000000  | 0.116332000  |
| 1 | 0.000000000 | 0.762680000  | -0.465326000 |
| 1 | 0.000000000 | -0.762680000 | -0.465326000 |

Zero-point correction= 0.021565 (Hartree/Particle)  
 Thermal correction to Energy= 0.024401  
 Thermal correction to Enthalpy= 0.025345  
 Thermal correction to Gibbs Free Energy= 0.003933  
 Sum of electronic and zero-point Energies= -76.408527  
 Sum of electronic and thermal Energies= -76.405691  
 Sum of electronic and thermal Enthalpies= -76.404747  
 Sum of electronic and thermal Free Energies= -76.426160

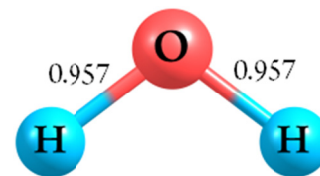

**H<sub>2</sub>O [ωB97XD]**

|   |             |              |              |
|---|-------------|--------------|--------------|
| 8 | 0.000000000 | 0.000000000  | 0.116406000  |
| 1 | 0.000000000 | 0.759867000  | -0.465625000 |
| 1 | 0.000000000 | -0.759867000 | -0.465625000 |

Zero-point correction= 0.021650 (Hartree/Particle)  
 Thermal correction to Energy= 0.024485  
 Thermal correction to Enthalpy= 0.025430  
 Thermal correction to Gibbs Free Energy= 0.004022  
 Sum of electronic and zero-point Energies= -76.418273  
 Sum of electronic and thermal Energies= -76.415437  
 Sum of electronic and thermal Enthalpies= -76.414493  
 Sum of electronic and thermal Free Energies= -76.435901

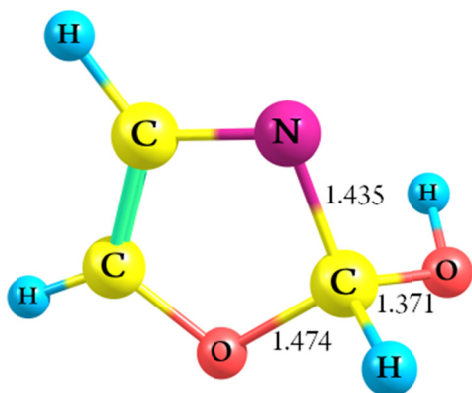

**P4 [M06-2x]**

|   |              |              |              |
|---|--------------|--------------|--------------|
| 6 | -1.333810000 | -0.644245000 | -0.172594000 |
| 6 | -1.281281000 | 0.750150000  | -0.135028000 |
| 6 | 0.714897000  | 0.015909000  | 0.427276000  |
| 7 | -0.090701000 | 1.182971000  | 0.205986000  |
| 8 | -0.145380000 | -1.146123000 | 0.142366000  |
| 8 | 1.843501000  | -0.032429000 | -0.349751000 |
| 1 | -2.130123000 | -1.325291000 | -0.419028000 |
| 1 | -2.095436000 | 1.420026000  | -0.367561000 |
| 1 | 1.020442000  | -0.091957000 | 1.468689000  |
| 1 | 1.656221000  | 0.413956000  | -1.182839000 |

Zero-point correction= 0.074012 (Hartree/Particle)  
 Thermal correction to Energy= 0.078994  
 Thermal correction to Enthalpy= 0.079938  
 Thermal correction to Gibbs Free Energy= 0.045108  
 Sum of electronic and zero-point Energies= -321.791099  
 Sum of electronic and thermal Energies= -321.786117  
 Sum of electronic and thermal Enthalpies= -321.785173  
 Sum of electronic and thermal Free Energies= -321.820003

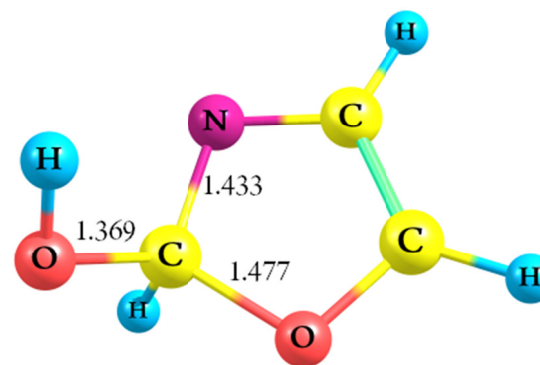

**P4 [ $\omega$ B97XD]**

|   |              |              |              |
|---|--------------|--------------|--------------|
| 6 | -1.334989000 | -0.640434000 | -0.170613000 |
| 6 | -1.281892000 | 0.749652000  | -0.134237000 |
| 6 | 0.714758000  | 0.016607000  | 0.424396000  |
| 7 | -0.088529000 | 1.182469000  | 0.204141000  |
| 8 | -0.148168000 | -1.148368000 | 0.139998000  |
| 8 | 1.845468000  | -0.033211000 | -0.346501000 |
| 1 | -2.131558000 | -1.321177000 | -0.417608000 |
| 1 | -2.093166000 | 1.423129000  | -0.365838000 |
| 1 | 1.016455000  | -0.092870000 | 1.467299000  |
| 1 | 1.662310000  | 0.411325000  | -1.178092000 |

Zero-point correction= 0.073728 (Hartree/Particle)  
 Thermal correction to Energy= 0.078789  
 Thermal correction to Enthalpy= 0.079733  
 Thermal correction to Gibbs Free Energy= 0.044755  
 Sum of electronic and zero-point Energies= -321.806060  
 Sum of electronic and thermal Energies= -321.801000  
 Sum of electronic and thermal Enthalpies= -321.800056  
 Sum of electronic and thermal Free Energies= -321.835034

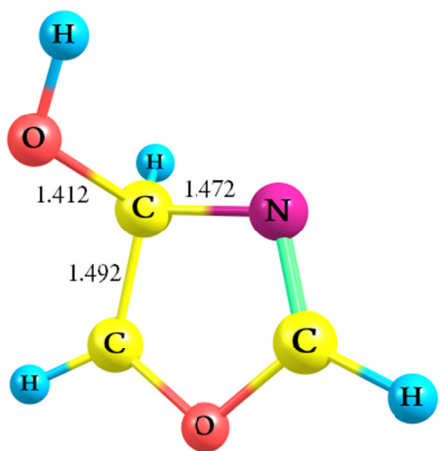

**P5 [M06-2x]**

|                                              |              |                             |              |
|----------------------------------------------|--------------|-----------------------------|--------------|
| 6                                            | 0.205869000  | 1.140894000                 | 0.247873000  |
| 6                                            | -0.746371000 | 0.012133000                 | 0.459667000  |
| 6                                            | 1.214522000  | -0.731875000                | -0.155048000 |
| 7                                            | 0.099413000  | -1.170673000                | 0.231321000  |
| 8                                            | 1.383214000  | 0.621573000                 | -0.220348000 |
| 8                                            | -1.802197000 | 0.075803000                 | -0.475379000 |
| 1                                            | -0.004190000 | 2.168127000                 | 0.010307000  |
| 1                                            | -1.152344000 | -0.028096000                | 1.474830000  |
| 1                                            | 2.077475000  | -1.311283000                | -0.448096000 |
| 1                                            | -2.309095000 | -0.739955000                | -0.405424000 |
| Zero-point correction=                       |              | 0.073204 (Hartree/Particle) |              |
| Thermal correction to Energy=                |              | 0.078521                    |              |
| Thermal correction to Enthalpy=              |              | 0.079465                    |              |
| Thermal correction to Gibbs Free Energy=     |              | 0.044015                    |              |
| Sum of electronic and zero-point Energies=   |              | -321.769278                 |              |
| Sum of electronic and thermal Energies=      |              | -321.763961                 |              |
| Sum of electronic and thermal Enthalpies=    |              | -321.763017                 |              |
| Sum of electronic and thermal Free Energies= |              | -321.798467                 |              |

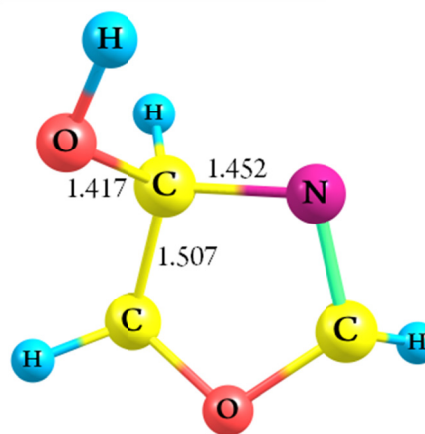

**P5 [ $\omega$ B97XD]**

|                                              |              |                            |              |
|----------------------------------------------|--------------|----------------------------|--------------|
| 6                                            | 0.206007000  | 1.136868000                | 0.235093000  |
| 6                                            | -0.744794000 | 0.010231000                | 0.450769000  |
| 6                                            | 1.219419000  | -0.730241000               | -0.152535000 |
| 7                                            | 0.099238000  | -1.170524000               | 0.220971000  |
| 8                                            | 1.389425000  | 0.620284000                | -0.212800000 |
| 8                                            | -1.813700000 | 0.076619000                | -0.468362000 |
| 1                                            | 0.014794000  | 2.174580000                | 0.029161000  |
| 1                                            | -1.139621000 | -0.028956000               | 1.472451000  |
| 1                                            | 2.083722000  | -1.311174000               | -0.437970000 |
| 1                                            | -2.343156000 | -0.717154000               | -0.361111000 |
| Zero-point correction=                       |              | 0.07295 (Hartree/Particle) |              |
| Thermal correction to Energy=                |              | 0.078328                   |              |
| Thermal correction to Enthalpy=              |              | 0.079272                   |              |
| Thermal correction to Gibbs Free Energy=     |              | 0.043721                   |              |
| Sum of electronic and zero-point Energies=   |              | -321.782914                |              |
| Sum of electronic and thermal Energies=      |              | -321.777544                |              |
| Sum of electronic and thermal Enthalpies=    |              | -321.776600                |              |
| Sum of electronic and thermal Free Energies= |              | -321.812151                |              |



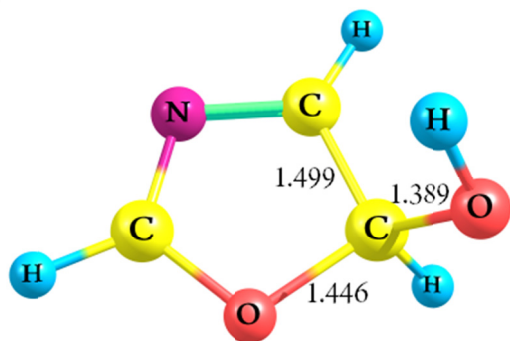

**P6 [M06-2x]**

|   |              |              |              |
|---|--------------|--------------|--------------|
| 6 | -0.739723000 | 0.004232000  | 0.446430000  |
| 6 | 0.190528000  | 1.150900000  | 0.186514000  |
| 6 | 1.320921000  | -0.592558000 | -0.178831000 |
| 1 | -1.114102000 | -0.085220000 | 1.466513000  |
| 1 | -0.053839000 | 2.194992000  | 0.284248000  |
| 1 | 2.106602000  | -1.282778000 | -0.438096000 |
| 7 | 1.394644000  | 0.708264000  | -0.210426000 |
| 8 | 0.145681000  | -1.114226000 | 0.209122000  |
| 8 | -1.860808000 | -0.056015000 | -0.371488000 |
| 1 | -1.610503000 | 0.201641000  | -1.265430000 |

Zero-point correction= 0.073313 (Hartree/Particle)  
 Thermal correction to Energy= 0.078346  
 Thermal correction to Enthalpy= 0.079291  
 Thermal correction to Gibbs Free Energy= 0.044400  
 Sum of electronic and zero-point Energies= -321.787995  
 Sum of electronic and thermal Energies= -321.782961  
 Sum of electronic and thermal Enthalpies= -321.782017  
 Sum of electronic and thermal Free Energies= -321.816907

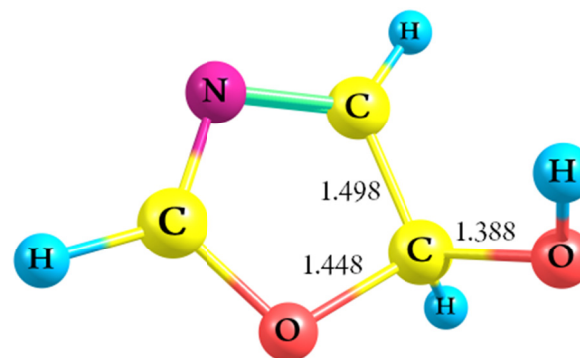

**P6 [ $\omega$ B97XD]**

|   |              |              |              |
|---|--------------|--------------|--------------|
| 6 | -0.739248000 | 0.006342000  | 0.443890000  |
| 6 | 0.193060000  | 1.150641000  | 0.185649000  |
| 6 | 1.319118000  | -0.593763000 | -0.178608000 |
| 1 | -1.113184000 | -0.082012000 | 1.464616000  |
| 1 | -0.048199000 | 2.195779000  | 0.285550000  |
| 1 | 2.102484000  | -1.285415000 | -0.441015000 |
| 7 | 1.395256000  | 0.707965000  | -0.210570000 |
| 8 | 0.145995000  | -1.115231000 | 0.210123000  |
| 8 | -1.862330000 | -0.055415000 | -0.370032000 |
| 1 | -1.614805000 | 0.201738000  | -1.261474000 |

Zero-point correction= 0.073228 (Hartree/Particle)  
 Thermal correction to Energy= 0.078295  
 Thermal correction to Enthalpy= 0.079239  
 Thermal correction to Gibbs Free Energy= 0.044302  
 Sum of electronic and zero-point Energies= -321.802738  
 Sum of electronic and thermal Energies= -321.797671  
 Sum of electronic and thermal Enthalpies= -321.796727  
 Sum of electronic and thermal Free Energies= -321.831665

**Table S2:** RRKM rate constants for OH-addition reaction pathways [4–6] at various  $P$  and  $T$ **Table S2a:**  $T= 299$  K.

| $P$      | Equilibrium constants ( $\text{bar}^{-1}$ ) |                         | Unimolecular rate constants ( $\text{s}^{-1}$ ) |           |           | Effective rate constants ( $\text{cm}^3 \text{ molecule}^{-1} \text{ s}^{-1}$ ) |                      |                      |                                |
|----------|---------------------------------------------|-------------------------|-------------------------------------------------|-----------|-----------|---------------------------------------------------------------------------------|----------------------|----------------------|--------------------------------|
|          | $K_{\text{P}(1)}$                           | $K_{\text{P}(X),x=2,3}$ | $k_2$ (4)                                       | $k_2$ (5) | $k_2$ (6) | $k_{\text{eff}}$ (4)                                                            | $k_{\text{eff}}$ (5) | $k_{\text{eff}}$ (6) | $k_{\text{eff}}$ [(4)+(5)+(6)] |
| 1.00E+08 | 4.99E-04                                    | 1.78E-03                | 2.40E+09                                        | 1.33E+07  | 8.71E+09  | 4.92E-14                                                                        | 9.74E-16             | 6.36E-13             | 6.86E-13                       |
| 1.00E+06 | 4.99E-04                                    | 1.78E-03                | 2.40E+09                                        | 1.33E+07  | 8.71E+09  | 4.92E-14                                                                        | 9.74E-16             | 6.36E-13             | 6.86E-13                       |
| 1.00E+04 | 4.99E-04                                    | 1.78E-03                | 2.40E+09                                        | 1.33E+07  | 8.70E+09  | 4.91E-14                                                                        | 9.74E-16             | 6.35E-13             | 6.85E-13                       |
| 1.00E+02 | 4.99E-04                                    | 1.78E-03                | 2.23E+09                                        | 1.33E+07  | 7.75E+09  | 4.56E-14                                                                        | 9.70E-16             | 5.66E-13             | 6.13E-13                       |
| 1.00E+00 | 4.99E-04                                    | 1.78E-03                | 3.75E+08                                        | 9.95E+06  | 8.34E+08  | 7.67E-15                                                                        | 7.27E-16             | 6.09E-14             | 6.93E-14                       |
| 1.00E-02 | 4.99E-04                                    | 1.78E-03                | 5.03E+06                                        | 7.25E+05  | 9.87E+06  | 1.03E-16                                                                        | 5.29E-17             | 7.21E-16             | 8.77E-16                       |
| 1.00E-04 | 4.99E-04                                    | 1.78E-03                | 5.05E+04                                        | 8.53E+03  | 9.89E+04  | 1.03E-18                                                                        | 6.23E-19             | 7.22E-18             | 8.88E-18                       |
| 1.00E-06 | 4.99E-04                                    | 1.78E-03                | 5.05E+02                                        | 8.54E+01  | 9.89E+02  | 1.03E-20                                                                        | 6.24E-21             | 7.22E-20             | 8.88E-20                       |
| 1.00E-08 | 4.99E-04                                    | 1.78E-03                | 5.05E+00                                        | 8.54E-01  | 9.89E+00  | 1.03E-22                                                                        | 6.24E-23             | 7.22E-22             | 8.88E-22                       |
| 1.00E-10 | 4.99E-04                                    | 1.78E-03                | 5.05E-02                                        | 8.54E-03  | 9.89E-02  | 1.03E-24                                                                        | 6.24E-25             | 7.22E-24             | 8.88E-24                       |

**Table S2b:**  $T= 324$  K.

| $P$      | Equilibrium constants ( $\text{bar}^{-1}$ ) |                         | Unimolecular rate constants ( $\text{s}^{-1}$ ) |           |           | Effective rate constants ( $\text{cm}^3 \text{ molecule}^{-1} \text{ s}^{-1}$ ) |                      |                      |                                |
|----------|---------------------------------------------|-------------------------|-------------------------------------------------|-----------|-----------|---------------------------------------------------------------------------------|----------------------|----------------------|--------------------------------|
|          | $K_{\text{P}(1)}$                           | $K_{\text{P}(X),X=2,3}$ | $k_2$ (4)                                       | $k_2$ (5) | $k_2$ (6) | $k_{\text{eff}}$ (4)                                                            | $k_{\text{eff}}$ (5) | $k_{\text{eff}}$ (6) | $k_{\text{eff}}$ [(4)+(5)+(6)] |
| 1.00E+08 | 3.89E-04                                    | 1.38E-03                | 3.61E+09                                        | 2.82E+07  | 1.13E+10  | 6.13E-14                                                                        | 1.70E-15             | 6.79E-13             | 7.42E-13                       |
| 1.00E+06 | 3.89E-04                                    | 1.38E-03                | 3.61E+09                                        | 2.82E+07  | 1.13E+10  | 6.13E-14                                                                        | 1.70E-15             | 6.79E-13             | 7.42E-13                       |
| 1.00E+04 | 3.89E-04                                    | 1.38E-03                | 3.61E+09                                        | 2.82E+07  | 1.13E+10  | 6.12E-14                                                                        | 1.70E-15             | 6.78E-13             | 7.41E-13                       |
| 1.00E+02 | 3.89E-04                                    | 1.38E-03                | 3.29E+09                                        | 2.81E+07  | 9.83E+09  | 5.59E-14                                                                        | 1.69E-15             | 5.92E-13             | 6.50E-13                       |
| 1.00E+00 | 3.89E-04                                    | 1.38E-03                | 4.75E+08                                        | 1.97E+07  | 9.17E+08  | 8.07E-15                                                                        | 1.19E-15             | 5.52E-14             | 6.45E-14                       |
| 1.00E-02 | 3.89E-04                                    | 1.38E-03                | 6.13E+06                                        | 1.21E+06  | 1.06E+07  | 1.04E-16                                                                        | 7.29E-17             | 6.36E-16             | 8.13E-16                       |
| 1.00E-04 | 3.89E-04                                    | 1.38E-03                | 6.15E+04                                        | 1.39E+04  | 1.06E+05  | 1.04E-18                                                                        | 8.38E-19             | 6.38E-18             | 8.26E-18                       |
| 1.00E-06 | 3.89E-04                                    | 1.38E-03                | 6.15E+02                                        | 1.39E+02  | 1.06E+03  | 1.04E-20                                                                        | 8.40E-21             | 6.38E-20             | 8.26E-20                       |
| 1.00E-08 | 3.89E-04                                    | 1.38E-03                | 6.15E+00                                        | 1.39E+00  | 1.06E+01  | 1.04E-22                                                                        | 8.40E-23             | 6.38E-22             | 8.26E-22                       |
| 1.00E-10 | 3.89E-04                                    | 1.38E-03                | 6.15E-02                                        | 1.39E-02  | 1.06E-01  | 1.04E-24                                                                        | 8.40E-25             | 6.38E-24             | 8.26E-24                       |

**Table S2c:**  $T= 348$  K.

| $P$      | Equilibrium constants ( $\text{bar}^{-1}$ ) |                         | Unimolecular rate constants ( $\text{s}^{-1}$ ) |           |           | Effective rate constants ( $\text{cm}^3 \text{ molecule}^{-1} \text{ s}^{-1}$ ) |                      |                      |                                |
|----------|---------------------------------------------|-------------------------|-------------------------------------------------|-----------|-----------|---------------------------------------------------------------------------------|----------------------|----------------------|--------------------------------|
|          | $K_{\text{P}(1)}$                           | $K_{\text{P}(X),X=2,3}$ | $k_2$ (4)                                       | $k_2$ (5) | $k_2$ (6) | $k_{\text{eff}}$ (4)                                                            | $k_{\text{eff}}$ (5) | $k_{\text{eff}}$ (6) | $k_{\text{eff}}$ [(4)+(5)+(6)] |
| 1.00E+08 | 3.19E-04                                    | 1.13E-03                | 5.05E+09                                        | 5.22E+07  | 1.39E+10  | 7.36E-14                                                                        | 2.70E-15             | 7.19E-13             | 7.96E-13                       |
| 1.00E+06 | 3.19E-04                                    | 1.13E-03                | 5.05E+09                                        | 5.22E+07  | 1.39E+10  | 7.36E-14                                                                        | 2.70E-15             | 7.19E-13             | 7.96E-13                       |
| 1.00E+04 | 3.19E-04                                    | 1.13E-03                | 5.04E+09                                        | 5.22E+07  | 1.39E+10  | 7.35E-14                                                                        | 2.70E-15             | 7.18E-13             | 7.94E-13                       |
| 1.00E+02 | 3.19E-04                                    | 1.13E-03                | 4.52E+09                                        | 5.18E+07  | 1.19E+10  | 6.59E-14                                                                        | 2.68E-15             | 6.14E-13             | 6.83E-13                       |
| 1.00E+00 | 3.19E-04                                    | 1.13E-03                | 5.66E+08                                        | 3.39E+07  | 9.74E+08  | 8.25E-15                                                                        | 1.75E-15             | 5.03E-14             | 6.03E-14                       |
| 1.00E-02 | 3.19E-04                                    | 1.13E-03                | 7.06E+06                                        | 1.80E+06  | 1.10E+07  | 1.03E-16                                                                        | 9.28E-17             | 5.68E-16             | 7.64E-16                       |
| 1.00E-04 | 3.19E-04                                    | 1.13E-03                | 7.08E+04                                        | 2.03E+04  | 1.10E+05  | 1.03E-18                                                                        | 1.05E-18             | 5.69E-18             | 7.77E-18                       |
| 1.00E-06 | 3.19E-04                                    | 1.13E-03                | 7.08E+02                                        | 2.03E+02  | 1.10E+03  | 1.03E-20                                                                        | 1.05E-20             | 5.69E-20             | 7.77E-20                       |
| 1.00E-08 | 3.19E-04                                    | 1.13E-03                | 7.08E+00                                        | 2.03E+00  | 1.10E+01  | 1.03E-22                                                                        | 1.05E-22             | 5.69E-22             | 7.77E-22                       |
| 1.00E-10 | 3.19E-04                                    | 1.13E-03                | 7.08E-02                                        | 2.03E-02  | 1.10E-01  | 1.03E-24                                                                        | 1.05E-24             | 5.69E-24             | 7.77E-24                       |

**Table S2d:**  $T= 373$  K.

| $P$      | Equilibrium constants ( $\text{bar}^{-1}$ ) |                         | Unimolecular rate constants ( $\text{s}^{-1}$ ) |           |           | Effective rate constants ( $\text{cm}^3 \text{ molecule}^{-1} \text{ s}^{-1}$ ) |                      |                      |                                |
|----------|---------------------------------------------|-------------------------|-------------------------------------------------|-----------|-----------|---------------------------------------------------------------------------------|----------------------|----------------------|--------------------------------|
|          | $K_{\text{P}(1)}$                           | $K_{\text{P}(X),X=2,3}$ | $k_2$ (4)                                       | $k_2$ (5) | $k_2$ (6) | $k_{\text{eff}}$ (4)                                                            | $k_{\text{eff}}$ (5) | $k_{\text{eff}}$ (6) | $k_{\text{eff}}$ [(4)+(5)+(6)] |
| 1.00E+08 | 2.68E-04                                    | 9.44E-04                | 6.82E+09                                        | 9.09E+07  | 1.68E+10  | 8.69E-14                                                                        | 4.08E-15             | 7.55E-13             | 8.46E-13                       |
| 1.00E+06 | 2.68E-04                                    | 9.44E-04                | 6.82E+09                                        | 9.09E+07  | 1.68E+10  | 8.69E-14                                                                        | 4.08E-15             | 7.55E-13             | 8.46E-13                       |
| 1.00E+04 | 2.68E-04                                    | 9.44E-04                | 6.81E+09                                        | 9.09E+07  | 1.68E+10  | 8.67E-14                                                                        | 4.08E-15             | 7.53E-13             | 8.44E-13                       |
| 1.00E+02 | 2.68E-04                                    | 9.44E-04                | 5.99E+09                                        | 9.01E+07  | 1.41E+10  | 7.63E-14                                                                        | 4.04E-15             | 6.30E-13             | 7.11E-13                       |
| 1.00E+00 | 2.68E-04                                    | 9.44E-04                | 6.50E+08                                        | 5.46E+07  | 1.01E+09  | 8.27E-15                                                                        | 2.45E-15             | 4.55E-14             | 5.62E-14                       |
| 1.00E-02 | 2.68E-04                                    | 9.44E-04                | 7.86E+06                                        | 2.50E+06  | 1.13E+07  | 1.00E-16                                                                        | 1.12E-16             | 5.05E-16             | 7.17E-16                       |
| 1.00E-04 | 2.68E-04                                    | 9.44E-04                | 7.88E+04                                        | 2.77E+04  | 1.13E+05  | 1.00E-18                                                                        | 1.24E-18             | 5.05E-18             | 7.30E-18                       |
| 1.00E-06 | 2.68E-04                                    | 9.44E-04                | 7.88E+02                                        | 2.77E+02  | 1.13E+03  | 1.00E-20                                                                        | 1.24E-20             | 5.05E-20             | 7.30E-20                       |
| 1.00E-08 | 2.68E-04                                    | 9.44E-04                | 7.88E+00                                        | 2.77E+00  | 1.13E+01  | 1.00E-22                                                                        | 1.24E-22             | 5.05E-22             | 7.30E-22                       |
| 1.00E-10 | 2.68E-04                                    | 9.44E-04                | 7.88E-02                                        | 2.77E-02  | 1.13E-01  | 1.00E-24                                                                        | 1.24E-24             | 5.05E-24             | 7.30E-24                       |

**Table S2e:**  $T= 398$  K.

| $P$      | Equilibrium constants ( $\text{bar}^{-1}$ ) |                         | Unimolecular rate constants ( $\text{s}^{-1}$ ) |           |           | Effective rate constants ( $\text{cm}^3 \text{ molecule}^{-1} \text{ s}^{-1}$ ) |                      |                      |                                |
|----------|---------------------------------------------|-------------------------|-------------------------------------------------|-----------|-----------|---------------------------------------------------------------------------------|----------------------|----------------------|--------------------------------|
|          | $K_{\text{P}(1)}$                           | $K_{\text{P}(X),X=2,3}$ | $k_2$ (4)                                       | $k_2$ (5) | $k_2$ (6) | $k_{\text{eff}}$ (4)                                                            | $k_{\text{eff}}$ (5) | $k_{\text{eff}}$ (6) | $k_{\text{eff}}$ [(4)+(5)+(6)] |
| 1.00E+08 | 2.31E-04                                    | 8.12E-04                | 8.87E+09                                        | 1.48E+08  | 1.98E+10  | 9.99E-14                                                                        | 5.84E-15             | 7.85E-13             | 8.91E-13                       |
| 1.00E+06 | 2.31E-04                                    | 8.12E-04                | 8.87E+09                                        | 1.48E+08  | 1.98E+10  | 9.99E-14                                                                        | 5.84E-15             | 7.85E-13             | 8.91E-13                       |
| 1.00E+04 | 2.31E-04                                    | 8.12E-04                | 8.86E+09                                        | 1.48E+08  | 1.98E+10  | 9.97E-14                                                                        | 5.84E-15             | 7.83E-13             | 8.89E-13                       |
| 1.00E+02 | 2.31E-04                                    | 8.12E-04                | 7.62E+09                                        | 1.46E+08  | 1.62E+10  | 8.58E-14                                                                        | 5.78E-15             | 6.40E-13             | 7.32E-13                       |
| 1.00E+00 | 2.31E-04                                    | 8.12E-04                | 7.20E+08                                        | 8.14E+07  | 1.04E+09  | 8.11E-15                                                                        | 3.22E-15             | 4.10E-14             | 5.24E-14                       |
| 1.00E-02 | 2.31E-04                                    | 8.12E-04                | 8.49E+06                                        | 3.25E+06  | 1.13E+07  | 9.56E-17                                                                        | 1.29E-16             | 4.49E-16             | 6.73E-16                       |
| 1.00E-04 | 2.31E-04                                    | 8.12E-04                | 8.51E+04                                        | 3.55E+04  | 1.13E+05  | 9.58E-19                                                                        | 1.41E-18             | 4.49E-18             | 6.86E-18                       |
| 1.00E-06 | 2.31E-04                                    | 8.12E-04                | 8.51E+02                                        | 3.56E+02  | 1.13E+03  | 9.58E-21                                                                        | 1.41E-20             | 4.49E-20             | 6.86E-20                       |
| 1.00E-08 | 2.31E-04                                    | 8.12E-04                | 8.51E+00                                        | 3.56E+00  | 1.13E+01  | 9.58E-23                                                                        | 1.41E-22             | 4.49E-22             | 6.86E-22                       |
| 1.00E-10 | 2.31E-04                                    | 8.12E-04                | 8.51E-02                                        | 3.56E-02  | 1.13E-01  | 9.58E-25                                                                        | 1.41E-24             | 4.49E-24             | 6.86E-24                       |

**Table S2f:**  $T= 423$  K.

| $P$      | Equilibrium constants ( $\text{bar}^{-1}$ ) |                         | Unimolecular rate constants ( $\text{s}^{-1}$ ) |           |           | Effective rate constants ( $\text{cm}^3 \text{ molecule}^{-1} \text{ s}^{-1}$ ) |                      |                      |                                |
|----------|---------------------------------------------|-------------------------|-------------------------------------------------|-----------|-----------|---------------------------------------------------------------------------------|----------------------|----------------------|--------------------------------|
|          | $K_{\text{P}(1)}$                           | $K_{\text{P}(X),X=2,3}$ | $k_2$ (4)                                       | $k_2$ (5) | $k_2$ (6) | $k_{\text{eff}}$ (4)                                                            | $k_{\text{eff}}$ (5) | $k_{\text{eff}}$ (6) | $k_{\text{eff}}$ [(4)+(5)+(6)] |
| 1.00E+08 | 2.04E-04                                    | 7.14E-04                | 1.12E+10                                        | 2.26E+08  | 2.29E+10  | 1.14E-13                                                                        | 8.06E-15             | 8.17E-13             | 9.39E-13                       |
| 1.00E+06 | 2.04E-04                                    | 7.14E-04                | 1.12E+10                                        | 2.26E+08  | 2.29E+10  | 1.14E-13                                                                        | 8.06E-15             | 8.17E-13             | 9.39E-13                       |
| 1.00E+04 | 2.04E-04                                    | 7.14E-04                | 1.12E+10                                        | 2.26E+08  | 2.28E+10  | 1.14E-13                                                                        | 8.06E-15             | 8.15E-13             | 9.37E-13                       |
| 1.00E+02 | 2.04E-04                                    | 7.14E-04                | 9.38E+09                                        | 2.23E+08  | 1.82E+10  | 9.56E-14                                                                        | 7.95E-15             | 6.50E-13             | 7.54E-13                       |
| 1.00E+00 | 2.04E-04                                    | 7.14E-04                | 7.77E+08                                        | 1.14E+08  | 1.05E+09  | 7.92E-15                                                                        | 4.06E-15             | 3.73E-14             | 4.93E-14                       |
| 1.00E-02 | 2.04E-04                                    | 7.14E-04                | 8.95E+06                                        | 4.01E+06  | 1.13E+07  | 9.13E-17                                                                        | 1.43E-16             | 4.03E-16             | 6.38E-16                       |
| 1.00E-04 | 2.04E-04                                    | 7.14E-04                | 8.97E+04                                        | 4.33E+04  | 1.13E+05  | 9.15E-19                                                                        | 1.54E-18             | 4.03E-18             | 6.49E-18                       |
| 1.00E-06 | 2.04E-04                                    | 7.14E-04                | 8.97E+02                                        | 4.33E+02  | 1.13E+03  | 9.15E-21                                                                        | 1.55E-20             | 4.03E-20             | 6.50E-20                       |
| 1.00E-08 | 2.04E-04                                    | 7.14E-04                | 8.97E+00                                        | 4.33E+00  | 1.13E+01  | 9.15E-23                                                                        | 1.55E-22             | 4.03E-22             | 6.50E-22                       |
| 1.00E-10 | 2.04E-04                                    | 7.14E-04                | 8.97E-02                                        | 4.33E-02  | 1.13E-01  | 9.15E-25                                                                        | 1.55E-24             | 4.03E-24             | 6.50E-24                       |

**Table S2g:**  $T= 449$  K.

| $P$      | Equilibrium constants ( $\text{bar}^{-1}$ ) |                         | Unimolecular rate constants ( $\text{s}^{-1}$ ) |           |           | Effective rate constants ( $\text{cm}^3 \text{ molecule}^{-1} \text{ s}^{-1}$ ) |                      |                      |                                |
|----------|---------------------------------------------|-------------------------|-------------------------------------------------|-----------|-----------|---------------------------------------------------------------------------------|----------------------|----------------------|--------------------------------|
|          | $K_{\text{P}(1)}$                           | $K_{\text{P}(X),X=2,3}$ | $k_2$ (4)                                       | $k_2$ (5) | $k_2$ (6) | $k_{\text{eff}}$ (4)                                                            | $k_{\text{eff}}$ (5) | $k_{\text{eff}}$ (6) | $k_{\text{eff}}$ [(4)+(5)+(6)] |
| 1.00E+08 | 1.82E-04                                    | 6.37E-04                | 1.38E+10                                        | 3.34E+08  | 2.61E+10  | 1.34E-13                                                                        | 1.13E-14             | 8.86E-13             | 1.03E-12                       |
| 1.00E+06 | 1.82E-04                                    | 6.37E-04                | 1.38E+10                                        | 3.34E+08  | 2.61E+10  | 1.34E-13                                                                        | 1.13E-14             | 8.86E-13             | 1.03E-12                       |
| 1.00E+04 | 1.82E-04                                    | 6.37E-04                | 1.38E+10                                        | 3.34E+08  | 2.60E+10  | 1.34E-13                                                                        | 1.13E-14             | 8.84E-13             | 1.03E-12                       |
| 1.00E+02 | 1.82E-04                                    | 6.37E-04                | 1.13E+10                                        | 3.28E+08  | 2.02E+10  | 1.10E-13                                                                        | 1.11E-14             | 6.87E-13             | 8.07E-13                       |
| 1.00E+00 | 1.82E-04                                    | 6.37E-04                | 8.21E+08                                        | 1.53E+08  | 1.04E+09  | 7.96E-15                                                                        | 5.18E-15             | 3.55E-14             | 4.86E-14                       |
| 1.00E-02 | 1.82E-04                                    | 6.37E-04                | 9.28E+06                                        | 4.77E+06  | 1.12E+07  | 9.00E-17                                                                        | 1.62E-16             | 3.79E-16             | 6.31E-16                       |
| 1.00E-04 | 1.82E-04                                    | 6.37E-04                | 9.29E+04                                        | 5.08E+04  | 1.12E+05  | 9.01E-19                                                                        | 1.73E-18             | 3.79E-18             | 6.42E-18                       |
| 1.00E-06 | 1.82E-04                                    | 6.37E-04                | 9.29E+02                                        | 5.09E+02  | 1.12E+03  | 9.01E-21                                                                        | 1.73E-20             | 3.79E-20             | 6.42E-20                       |
| 1.00E-08 | 1.82E-04                                    | 6.37E-04                | 9.29E+00                                        | 5.09E+00  | 1.12E+01  | 9.01E-23                                                                        | 1.73E-22             | 3.79E-22             | 6.42E-22                       |
| 1.00E-10 | 1.82E-04                                    | 6.37E-04                | 9.29E-02                                        | 5.09E-02  | 1.12E-01  | 9.01E-25                                                                        | 1.73E-24             | 3.79E-24             | 6.42E-24                       |



**Table S2h:**  $T= 468$  K.

| $P$      | Equilibrium constants ( $\text{bar}^{-1}$ ) |                         | Unimolecular rate constants ( $\text{s}^{-1}$ ) |           |           | Effective rate constants ( $\text{cm}^3 \text{ molecule}^{-1} \text{ s}^{-1}$ ) |                      |                      |                                |
|----------|---------------------------------------------|-------------------------|-------------------------------------------------|-----------|-----------|---------------------------------------------------------------------------------|----------------------|----------------------|--------------------------------|
|          | $K_{\text{P}(1)}$                           | $K_{\text{P}(X),X=2,3}$ | $k_2$ (4)                                       | $k_2$ (5) | $k_2$ (6) | $k_{\text{eff}}$ (4)                                                            | $k_{\text{eff}}$ (5) | $k_{\text{eff}}$ (6) | $k_{\text{eff}}$ [(4)+(5)+(6)] |
| 1.00E+08 | 1.70E-04                                    | 5.92E-04                | 1.59E+10                                        | 4.32E+08  | 2.85E+10  | 1.50E-13                                                                        | 1.42E-14             | 9.35E-13             | 1.10E-12                       |
| 1.00E+06 | 1.70E-04                                    | 5.92E-04                | 1.59E+10                                        | 4.32E+08  | 2.85E+10  | 1.50E-13                                                                        | 1.42E-14             | 9.35E-13             | 1.10E-12                       |
| 1.00E+04 | 1.70E-04                                    | 5.92E-04                | 1.59E+10                                        | 4.32E+08  | 2.84E+10  | 1.50E-13                                                                        | 1.42E-14             | 9.32E-13             | 1.10E-12                       |
| 1.00E+02 | 1.70E-04                                    | 5.92E-04                | 1.27E+10                                        | 4.24E+08  | 2.16E+10  | 1.20E-13                                                                        | 1.39E-14             | 7.10E-13             | 8.44E-13                       |
| 1.00E+00 | 1.70E-04                                    | 5.92E-04                | 8.44E+08                                        | 1.83E+08  | 1.04E+09  | 7.97E-15                                                                        | 6.02E-15             | 3.41E-14             | 4.81E-14                       |
| 1.00E-02 | 1.70E-04                                    | 5.92E-04                | 9.42E+06                                        | 5.28E+06  | 1.10E+07  | 8.89E-17                                                                        | 1.73E-16             | 3.62E-16             | 6.24E-16                       |
| 1.00E-04 | 1.70E-04                                    | 5.92E-04                | 9.44E+04                                        | 5.59E+04  | 1.10E+05  | 8.90E-19                                                                        | 1.84E-18             | 3.62E-18             | 6.35E-18                       |
| 1.00E-06 | 1.70E-04                                    | 5.92E-04                | 9.44E+02                                        | 5.59E+02  | 1.10E+03  | 8.91E-21                                                                        | 1.84E-20             | 3.62E-20             | 6.35E-20                       |
| 1.00E-08 | 1.70E-04                                    | 5.92E-04                | 9.44E+00                                        | 5.59E+00  | 1.10E+01  | 8.91E-23                                                                        | 1.84E-22             | 3.62E-22             | 6.35E-22                       |
| 1.00E-10 | 1.70E-04                                    | 5.92E-04                | 9.44E-02                                        | 5.59E-02  | 1.10E-01  | 8.91E-25                                                                        | 1.84E-24             | 3.62E-24             | 6.35E-24                       |

**Table S3:** Effective rate coefficients  $k_{\text{eff}}$  (in  $\text{cm}^3 \text{ molecule}^{-1} \text{ s}^{-1}$ ), regioselectivity, and branching ratios (%) for the OH-addition pathways [4–6] at different  $P$  and  $T$  using RRKM theory.

**Table S3a:**  $T=299 \text{ K}$ .

| $P$      | Effective rate constants     |                              |                              | Branching ratios |                 |                 | Regioselectivity |                                                                                                       |                                   |                                   |                                   |
|----------|------------------------------|------------------------------|------------------------------|------------------|-----------------|-----------------|------------------|-------------------------------------------------------------------------------------------------------|-----------------------------------|-----------------------------------|-----------------------------------|
|          | $k_{\text{eff}}(\mathbf{4})$ | $k_{\text{eff}}(\mathbf{5})$ | $k_{\text{eff}}(\mathbf{6})$ | $R(\mathbf{4})$  | $R(\mathbf{5})$ | $R(\mathbf{6})$ | $\text{Log}P$    | $\frac{\{R(\mathbf{6})-[R(\mathbf{4})+R(\mathbf{5})]\}}{[R(\mathbf{4})+R(\mathbf{5})+R(\mathbf{6})]}$ | $\log k_{\text{eff}}(\mathbf{4})$ | $\log k_{\text{eff}}(\mathbf{5})$ | $\log k_{\text{eff}}(\mathbf{6})$ |
| 1.00E+08 | 4.92E-14                     | 9.74E-16                     | 6.36E-13                     | 7.16             | 0.14            | 92.70           | 8                | 0.8539                                                                                                | -13.308                           | -15.011                           | -12.196                           |
| 1.00E+06 | 4.92E-14                     | 9.74E-16                     | 6.36E-13                     | 7.16             | 0.14            | 92.70           | 6                | 0.8539                                                                                                | -13.308                           | -15.011                           | -12.196                           |
| 1.00E+04 | 4.91E-14                     | 9.74E-16                     | 6.35E-13                     | 7.17             | 0.14            | 92.69           | 4                | 0.8538                                                                                                | -13.309                           | -15.011                           | -12.197                           |
| 1.00E+02 | 4.56E-14                     | 9.70E-16                     | 5.66E-13                     | 7.44             | 0.16            | 92.40           | 2                | 0.8480                                                                                                | -13.341                           | -15.013                           | -12.247                           |
| 1.00E+00 | 7.67E-15                     | 7.27E-16                     | 6.09E-14                     | 11.07            | 1.05            | 87.88           | 0                | 0.7577                                                                                                | -14.115                           | -15.139                           | -13.215                           |
| 1.00E-02 | 1.03E-16                     | 5.29E-17                     | 7.21E-16                     | 11.75            | 6.04            | 82.22           | -2               | 0.6443                                                                                                | -15.987                           | -16.276                           | -15.142                           |
| 1.00E-04 | 1.03E-18                     | 6.23E-19                     | 7.22E-18                     | 11.65            | 7.01            | 81.34           | -4               | 0.6268                                                                                                | -17.985                           | -18.206                           | -17.141                           |
| 1.00E-06 | 1.03E-20                     | 6.24E-21                     | 7.22E-20                     | 11.65            | 7.02            | 81.33           | -6               | 0.6266                                                                                                | -19.985                           | -20.205                           | -19.141                           |
| 1.00E-08 | 1.03E-22                     | 6.24E-23                     | 7.22E-22                     | 11.65            | 7.02            | 81.33           | -8               | 0.6266                                                                                                | -21.985                           | -22.205                           | -21.141                           |
| 1.00E-10 | 1.03E-24                     | 6.24E-25                     | 7.22E-24                     | 11.65            | 7.02            | 81.33           | -10              | 0.6266                                                                                                | -23.985                           | -24.205                           | -23.141                           |

**Table S3b:**  $T= 324$  K.

| $P$      | Effective rate constants     |                              |                              | Branching ratios |                 |                 | Regioselectivity |                                                                                                       |                                   |                                   |                                   |
|----------|------------------------------|------------------------------|------------------------------|------------------|-----------------|-----------------|------------------|-------------------------------------------------------------------------------------------------------|-----------------------------------|-----------------------------------|-----------------------------------|
|          | $k_{\text{eff}}(\mathbf{4})$ | $k_{\text{eff}}(\mathbf{5})$ | $k_{\text{eff}}(\mathbf{6})$ | $R(\mathbf{4})$  | $R(\mathbf{5})$ | $R(\mathbf{6})$ | $\text{Log}P$    | $\frac{\{R(\mathbf{6})-[R(\mathbf{4})+R(\mathbf{5})]\}}{[R(\mathbf{4})+R(\mathbf{5})+R(\mathbf{6})]}$ | $\log k_{\text{eff}}(\mathbf{4})$ | $\log k_{\text{eff}}(\mathbf{5})$ | $\log k_{\text{eff}}(\mathbf{6})$ |
| 1.00E+08 | 6.13E-14                     | 1.70E-15                     | 6.79E-13                     | 8.26             | 0.23            | 91.51           | 8                | 0.8303                                                                                                | -13.213                           | -14.770                           | -12.168                           |
| 1.00E+06 | 6.13E-14                     | 1.70E-15                     | 6.79E-13                     | 8.26             | 0.23            | 91.51           | 6                | 0.8303                                                                                                | -13.213                           | -14.770                           | -12.168                           |
| 1.00E+04 | 6.12E-14                     | 1.70E-15                     | 6.78E-13                     | 8.26             | 0.23            | 91.51           | 4                | 0.8302                                                                                                | -13.213                           | -14.770                           | -12.169                           |
| 1.00E+02 | 5.59E-14                     | 1.69E-15                     | 5.92E-13                     | 8.60             | 0.26            | 91.14           | 2                | 0.8227                                                                                                | -13.253                           | -14.772                           | -12.228                           |
| 1.00E+00 | 8.07E-15                     | 1.19E-15                     | 5.52E-14                     | 12.52            | 1.84            | 85.64           | 0                | 0.7128                                                                                                | -14.093                           | -14.926                           | -13.258                           |
| 1.00E-02 | 1.04E-16                     | 7.29E-17                     | 6.36E-16                     | 12.79            | 8.97            | 78.24           | -2               | 0.5649                                                                                                | -15.983                           | -16.137                           | -15.196                           |
| 1.00E-04 | 1.04E-18                     | 8.38E-19                     | 6.38E-18                     | 12.64            | 10.15           | 77.21           | -4               | 0.5442                                                                                                | -17.981                           | -18.077                           | -17.195                           |
| 1.00E-06 | 1.04E-20                     | 8.40E-21                     | 6.38E-20                     | 12.64            | 10.16           | 77.20           | -6               | 0.5439                                                                                                | -19.981                           | -20.076                           | -19.195                           |
| 1.00E-08 | 1.04E-22                     | 8.40E-23                     | 6.38E-22                     | 12.64            | 10.16           | 77.20           | -8               | 0.5439                                                                                                | -21.981                           | -22.076                           | -21.195                           |
| 1.00E-10 | 1.04E-24                     | 8.40E-25                     | 6.38E-24                     | 12.64            | 10.16           | 77.20           | -10              | 0.5439                                                                                                | -23.981                           | -24.076                           | -23.195                           |

**Table S3c:**  $T= 348$  K.

| $P$      | Effective rate constants     |                              |                              | Branching ratios |                 |                 | Regioselectivity |                                                                                                       |                                   |                                   |                                   |
|----------|------------------------------|------------------------------|------------------------------|------------------|-----------------|-----------------|------------------|-------------------------------------------------------------------------------------------------------|-----------------------------------|-----------------------------------|-----------------------------------|
|          | $k_{\text{eff}}(\mathbf{4})$ | $k_{\text{eff}}(\mathbf{5})$ | $k_{\text{eff}}(\mathbf{6})$ | $R(\mathbf{4})$  | $R(\mathbf{5})$ | $R(\mathbf{6})$ | $\text{Log}P$    | $\frac{\{R(\mathbf{6})-[R(\mathbf{4})+R(\mathbf{5})]\}}{[R(\mathbf{4})+R(\mathbf{5})+R(\mathbf{6})]}$ | $\log k_{\text{eff}}(\mathbf{4})$ | $\log k_{\text{eff}}(\mathbf{5})$ | $\log k_{\text{eff}}(\mathbf{6})$ |
| 1.00E+08 | 7.36E-14                     | 2.70E-15                     | 7.19E-13                     | 9.25             | 0.34            | 90.41           | 8                | 0.8082                                                                                                | -13.133                           | -14.569                           | -12.143                           |
| 1.00E+06 | 7.36E-14                     | 2.70E-15                     | 7.19E-13                     | 9.25             | 0.34            | 90.41           | 6                | 0.8082                                                                                                | -13.133                           | -14.569                           | -12.143                           |
| 1.00E+04 | 7.35E-14                     | 2.70E-15                     | 7.18E-13                     | 9.25             | 0.34            | 90.41           | 4                | 0.8081                                                                                                | -13.134                           | -14.569                           | -12.144                           |
| 1.00E+02 | 6.59E-14                     | 2.68E-15                     | 6.14E-13                     | 9.66             | 0.39            | 89.95           | 2                | 0.7991                                                                                                | -13.181                           | -14.572                           | -12.212                           |
| 1.00E+00 | 8.25E-15                     | 1.75E-15                     | 5.03E-14                     | 13.68            | 2.91            | 83.41           | 0                | 0.6682                                                                                                | -14.083                           | -14.756                           | -13.298                           |
| 1.00E-02 | 1.03E-16                     | 9.28E-17                     | 5.68E-16                     | 13.47            | 12.15           | 74.38           | -2               | 0.4877                                                                                                | -15.988                           | -16.032                           | -15.245                           |
| 1.00E-04 | 1.03E-18                     | 1.05E-18                     | 5.69E-18                     | 13.28            | 13.46           | 73.25           | -4               | 0.4651                                                                                                | -17.986                           | -17.980                           | -17.245                           |
| 1.00E-06 | 1.03E-20                     | 1.05E-20                     | 5.69E-20                     | 13.28            | 13.48           | 73.24           | -6               | 0.4648                                                                                                | -19.986                           | -19.980                           | -19.245                           |
| 1.00E-08 | 1.03E-22                     | 1.05E-22                     | 5.69E-22                     | 13.28            | 13.48           | 73.24           | -8               | 0.4648                                                                                                | -21.986                           | -21.980                           | -21.245                           |
| 1.00E-10 | 1.03E-24                     | 1.05E-24                     | 5.69E-24                     | 13.28            | 13.48           | 73.24           | -10              | 0.4648                                                                                                | -23.986                           | -23.980                           | -23.245                           |

**Table S3d:**  $T= 373$  K.

| $P$      | Effective rate constants |                     |                     | Branching ratios |        |        | Regioselectivity |                                                 |                          |                          |                          |
|----------|--------------------------|---------------------|---------------------|------------------|--------|--------|------------------|-------------------------------------------------|--------------------------|--------------------------|--------------------------|
|          | $k_{\text{eff}}(4)$      | $k_{\text{eff}}(5)$ | $k_{\text{eff}}(6)$ | $R(4)$           | $R(5)$ | $R(6)$ | $\text{Log}P$    | $\frac{\{R(6)-[R(4)+R(5)]\}}{[R(4)+R(5)+R(6)]}$ | $\log k_{\text{eff}}(4)$ | $\log k_{\text{eff}}(5)$ | $\log k_{\text{eff}}(6)$ |
| 1.00E+08 | 8.69E-14                 | 4.08E-15            | 7.55E-13            | 10.27            | 0.48   | 89.24  | 8                | 0.7849                                          | -13.061                  | -14.389                  | -12.122                  |
| 1.00E+06 | 8.69E-14                 | 4.08E-15            | 7.55E-13            | 10.27            | 0.48   | 89.25  | 6                | 0.7849                                          | -13.061                  | -14.389                  | -12.122                  |
| 1.00E+04 | 8.67E-14                 | 4.08E-15            | 7.53E-13            | 10.28            | 0.48   | 89.24  | 4                | 0.7848                                          | -13.062                  | -14.390                  | -12.123                  |
| 1.00E+02 | 7.63E-14                 | 4.04E-15            | 6.30E-13            | 10.74            | 0.57   | 88.69  | 2                | 0.7739                                          | -13.118                  | -14.393                  | -12.201                  |
| 1.00E+00 | 8.27E-15                 | 2.45E-15            | 4.55E-14            | 14.72            | 4.36   | 80.92  | 0                | 0.6184                                          | -14.082                  | -14.611                  | -13.342                  |
| 1.00E-02 | 1.00E-16                 | 1.12E-16            | 5.05E-16            | 13.96            | 15.64  | 70.40  | -2               | 0.4080                                          | -16.000                  | -15.950                  | -15.297                  |
| 1.00E-04 | 1.00E-18                 | 1.24E-18            | 5.05E-18            | 13.75            | 17.02  | 69.23  | -4               | 0.3847                                          | -17.999                  | -17.906                  | -17.297                  |
| 1.00E-06 | 1.00E-20                 | 1.24E-20            | 5.05E-20            | 13.75            | 17.04  | 69.22  | -6               | 0.3843                                          | -19.999                  | -19.905                  | -19.297                  |
| 1.00E-08 | 1.00E-22                 | 1.24E-22            | 5.05E-22            | 13.75            | 17.04  | 69.22  | -8               | 0.3843                                          | -21.999                  | -21.905                  | -21.297                  |
| 1.00E-10 | 1.00E-24                 | 1.24E-24            | 5.05E-24            | 13.75            | 17.04  | 69.22  | -10              | 0.3843                                          | -23.999                  | -23.905                  | -23.297                  |

**Table S3e:**  $T= 398$  K.

| $P$      | Effective rate constants |                     |                     | Branching ratios |        |        | Regioselectivity |                                                 |                          |                          |                          |
|----------|--------------------------|---------------------|---------------------|------------------|--------|--------|------------------|-------------------------------------------------|--------------------------|--------------------------|--------------------------|
|          | $k_{\text{eff}}(4)$      | $k_{\text{eff}}(5)$ | $k_{\text{eff}}(6)$ | $R(4)$           | $R(5)$ | $R(6)$ | $\text{Log}P$    | $\frac{\{R(6)-[R(4)+R(5)]\}}{[R(4)+R(5)+R(6)]}$ | $\log k_{\text{eff}}(4)$ | $\log k_{\text{eff}}(5)$ | $\log k_{\text{eff}}(6)$ |
| 1.00E+08 | 9.99E-14                 | 5.84E-15            | 7.85E-13            | 11.22            | 0.66   | 88.13  | 8                | 0.7625                                          | -13.000                  | -14.233                  | -12.105                  |
| 1.00E+06 | 9.99E-14                 | 5.84E-15            | 7.85E-13            | 11.22            | 0.66   | 88.13  | 6                | 0.7625                                          | -13.000                  | -14.233                  | -12.105                  |
| 1.00E+04 | 9.97E-14                 | 5.84E-15            | 7.83E-13            | 11.22            | 0.66   | 88.12  | 4                | 0.7624                                          | -13.001                  | -14.234                  | -12.106                  |
| 1.00E+02 | 8.58E-14                 | 5.78E-15            | 6.40E-13            | 11.73            | 0.79   | 87.48  | 2                | 0.7496                                          | -13.066                  | -14.238                  | -12.194                  |
| 1.00E+00 | 8.11E-15                 | 3.22E-15            | 4.10E-14            | 15.48            | 6.15   | 78.37  | 0                | 0.5673                                          | -14.091                  | -14.492                  | -13.387                  |
| 1.00E-02 | 9.56E-17                 | 1.29E-16            | 4.49E-16            | 14.21            | 19.13  | 66.66  | -2               | 0.3333                                          | -16.019                  | -15.890                  | -15.348                  |
| 1.00E-04 | 9.58E-19                 | 1.41E-18            | 4.49E-18            | 13.98            | 20.51  | 65.52  | -4               | 0.3103                                          | -18.019                  | -17.852                  | -17.348                  |
| 1.00E-06 | 9.58E-21                 | 1.41E-20            | 4.49E-20            | 13.97            | 20.52  | 65.50  | -6               | 0.3100                                          | -20.018                  | -19.852                  | -19.348                  |
| 1.00E-08 | 9.58E-23                 | 1.41E-22            | 4.49E-22            | 13.97            | 20.52  | 65.50  | -8               | 0.3100                                          | -22.018                  | -21.852                  | -21.348                  |
| 1.00E-10 | 9.58E-25                 | 1.41E-24            | 4.49E-24            | 13.97            | 20.52  | 65.50  | -10              | 0.3100                                          | -24.018                  | -23.852                  | -23.348                  |

**Table S3f:**  $T= 423$  K.

| $P$      | Effective rate constants     |                              |                              | Branching ratios |                 |                 | Regioselectivity |                                                                                                       |                                   |                                   |                                   |
|----------|------------------------------|------------------------------|------------------------------|------------------|-----------------|-----------------|------------------|-------------------------------------------------------------------------------------------------------|-----------------------------------|-----------------------------------|-----------------------------------|
|          | $k_{\text{eff}}(\mathbf{4})$ | $k_{\text{eff}}(\mathbf{5})$ | $k_{\text{eff}}(\mathbf{6})$ | $R(\mathbf{4})$  | $R(\mathbf{5})$ | $R(\mathbf{6})$ | $\text{Log}P$    | $\frac{\{R(\mathbf{6})-[R(\mathbf{4})+R(\mathbf{5})]\}}{[R(\mathbf{4})+R(\mathbf{5})+R(\mathbf{6})]}$ | $\log k_{\text{eff}}(\mathbf{4})$ | $\log k_{\text{eff}}(\mathbf{5})$ | $\log k_{\text{eff}}(\mathbf{6})$ |
| 1.00E+08 | 1.14E-13                     | 8.06E-15                     | 8.17E-13                     | 12.14            | 0.86            | 87.00           | 8                | 0.7401                                                                                                | -12.943                           | -14.094                           | -12.088                           |
| 1.00E+06 | 1.14E-13                     | 8.06E-15                     | 8.17E-13                     | 12.14            | 0.86            | 87.00           | 6                | 0.7401                                                                                                | -12.943                           | -14.094                           | -12.088                           |
| 1.00E+04 | 1.14E-13                     | 8.06E-15                     | 8.15E-13                     | 12.14            | 0.86            | 87.00           | 4                | 0.7399                                                                                                | -12.944                           | -14.094                           | -12.089                           |
| 1.00E+02 | 9.56E-14                     | 7.95E-15                     | 6.50E-13                     | 12.69            | 1.06            | 86.26           | 2                | 0.7251                                                                                                | -13.019                           | -14.100                           | -12.187                           |
| 1.00E+00 | 7.92E-15                     | 4.06E-15                     | 3.73E-14                     | 16.06            | 8.24            | 75.71           | 0                | 0.5142                                                                                                | -14.101                           | -14.391                           | -13.428                           |
| 1.00E-02 | 9.13E-17                     | 1.43E-16                     | 4.03E-16                     | 14.32            | 22.46           | 63.22           | -2               | 0.2644                                                                                                | -16.039                           | -15.844                           | -15.395                           |
| 1.00E-04 | 9.15E-19                     | 1.54E-18                     | 4.03E-18                     | 14.09            | 23.78           | 62.13           | -4               | 0.2426                                                                                                | -18.039                           | -17.811                           | -17.394                           |
| 1.00E-06 | 9.15E-21                     | 1.55E-20                     | 4.03E-20                     | 14.09            | 23.80           | 62.11           | -6               | 0.2423                                                                                                | -20.039                           | -19.811                           | -19.394                           |
| 1.00E-08 | 9.15E-23                     | 1.55E-22                     | 4.03E-22                     | 14.09            | 23.80           | 62.11           | -8               | 0.2423                                                                                                | -22.039                           | -21.811                           | -21.394                           |
| 1.00E-10 | 9.15E-25                     | 1.55E-24                     | 4.03E-24                     | 14.09            | 23.80           | 62.11           | -10              | 0.2423                                                                                                | -24.039                           | -23.811                           | -23.394                           |

**Table S3g:**  $T= 449$  K.

| $P$      | Effective rate constants     |                              |                              | Branching ratios |                 |                 | Regioselectivity |                                                                                                       |                                   |                                   |                                   |
|----------|------------------------------|------------------------------|------------------------------|------------------|-----------------|-----------------|------------------|-------------------------------------------------------------------------------------------------------|-----------------------------------|-----------------------------------|-----------------------------------|
|          | $k_{\text{eff}}(\mathbf{4})$ | $k_{\text{eff}}(\mathbf{5})$ | $k_{\text{eff}}(\mathbf{6})$ | $R(\mathbf{4})$  | $R(\mathbf{5})$ | $R(\mathbf{6})$ | $\text{Log}P$    | $\frac{\{R(\mathbf{6})-[R(\mathbf{4})+R(\mathbf{5})]\}}{[R(\mathbf{4})+R(\mathbf{5})+R(\mathbf{6})]}$ | $\log k_{\text{eff}}(\mathbf{4})$ | $\log k_{\text{eff}}(\mathbf{5})$ | $\log k_{\text{eff}}(\mathbf{6})$ |
| 1.00E+08 | 1.34E-13                     | 1.13E-14                     | 8.86E-13                     | 12.99            | 1.10            | 85.91           | 8                | 0.7182                                                                                                | -12.873                           | -13.945                           | -12.052                           |
| 1.00E+06 | 1.34E-13                     | 1.13E-14                     | 8.86E-13                     | 12.99            | 1.10            | 85.91           | 6                | 0.7182                                                                                                | -12.873                           | -13.945                           | -12.052                           |
| 1.00E+04 | 1.34E-13                     | 1.13E-14                     | 8.84E-13                     | 13.00            | 1.10            | 85.90           | 4                | 0.7180                                                                                                | -12.874                           | -13.945                           | -12.054                           |
| 1.00E+02 | 1.10E-13                     | 1.11E-14                     | 6.87E-13                     | 13.56            | 1.38            | 85.05           | 2                | 0.7011                                                                                                | -12.961                           | -13.953                           | -12.163                           |
| 1.00E+00 | 7.96E-15                     | 5.18E-15                     | 3.55E-14                     | 16.38            | 10.65           | 72.97           | 0                | 0.4594                                                                                                | -14.099                           | -14.286                           | -13.450                           |
| 1.00E-02 | 9.00E-17                     | 1.62E-16                     | 3.79E-16                     | 14.27            | 25.67           | 60.06           | -2               | 0.2012                                                                                                | -16.046                           | -15.791                           | -15.422                           |
| 1.00E-04 | 9.01E-19                     | 1.73E-18                     | 3.79E-18                     | 14.04            | 26.90           | 59.06           | -4               | 0.1811                                                                                                | -18.045                           | -17.763                           | -17.421                           |
| 1.00E-06 | 9.01E-21                     | 1.73E-20                     | 3.79E-20                     | 14.04            | 26.92           | 59.04           | -6               | 0.1809                                                                                                | -20.045                           | -19.762                           | -19.421                           |
| 1.00E-08 | 9.01E-23                     | 1.73E-22                     | 3.79E-22                     | 14.04            | 26.92           | 59.04           | -8               | 0.1808                                                                                                | -22.045                           | -21.762                           | -21.421                           |
| 1.00E-10 | 9.01E-25                     | 1.73E-24                     | 3.79E-24                     | 14.04            | 26.92           | 59.04           | -10              | 0.1808                                                                                                | -24.045                           | -23.762                           | -23.421                           |



**Table S3h:**  $T= 468$  K.

| $P$      | Effective rate constants |                     |                     | Branching ratios |        |        | Regioselectivity |                                                 |                          |                          |                          |
|----------|--------------------------|---------------------|---------------------|------------------|--------|--------|------------------|-------------------------------------------------|--------------------------|--------------------------|--------------------------|
|          | $k_{\text{eff}}(4)$      | $k_{\text{eff}}(5)$ | $k_{\text{eff}}(6)$ | $R(4)$           | $R(5)$ | $R(6)$ | $\text{Log}P$    | $\frac{\{R(6)-[R(4)+R(5)]\}}{[R(4)+R(5)+R(6)]}$ | $\log k_{\text{eff}}(4)$ | $\log k_{\text{eff}}(5)$ | $\log k_{\text{eff}}(6)$ |
| 1.00E+08 | 1.50E-13                 | 1.42E-14            | 9.35E-13            | 13.64            | 1.29   | 85.07  | 8                | 0.7013                                          | -12.824                  | -13.847                  | -12.029                  |
| 1.00E+06 | 1.50E-13                 | 1.42E-14            | 9.35E-13            | 13.64            | 1.29   | 85.07  | 6                | 0.7013                                          | -12.824                  | -13.847                  | -12.029                  |
| 1.00E+04 | 1.50E-13                 | 1.42E-14            | 9.32E-13            | 13.65            | 1.30   | 85.05  | 4                | 0.7011                                          | -12.825                  | -13.848                  | -12.030                  |
| 1.00E+02 | 1.20E-13                 | 1.39E-14            | 7.10E-13            | 14.22            | 1.65   | 84.13  | 2                | 0.6826                                          | -12.921                  | -13.856                  | -12.149                  |
| 1.00E+00 | 7.97E-15                 | 6.02E-15            | 3.41E-14            | 16.56            | 12.52  | 70.92  | 0                | 0.4184                                          | -14.099                  | -14.220                  | -13.467                  |
| 1.00E-02 | 8.89E-17                 | 1.73E-16            | 3.62E-16            | 14.25            | 27.79  | 57.97  | -2               | 0.1593                                          | -16.051                  | -15.761                  | -15.442                  |
| 1.00E-04 | 8.90E-19                 | 1.84E-18            | 3.62E-18            | 14.03            | 28.94  | 57.03  | -4               | 0.1407                                          | -18.050                  | -17.736                  | -17.441                  |
| 1.00E-06 | 8.91E-21                 | 1.84E-20            | 3.62E-20            | 14.03            | 28.95  | 57.02  | -6               | 0.1405                                          | -20.050                  | -19.736                  | -19.441                  |
| 1.00E-08 | 8.91E-23                 | 1.84E-22            | 3.62E-22            | 14.03            | 28.95  | 57.02  | -8               | 0.1404                                          | -22.050                  | -21.736                  | -21.441                  |
| 1.00E-10 | 8.91E-25                 | 1.84E-24            | 3.62E-24            | 14.03            | 28.95  | 57.02  | -10              | 0.1404                                          | -24.050                  | -23.736                  | -23.441                  |
